# Supplementary material
Source: PubMed Central journal article supplement (PMC6645979)
Supplement: ao8b00404_si_001.pdf [file ao8b00404_si_001.pdf]

## Supporting Information

# Stability of a Series of BODIPYs in Acidic Conditions: An Experimental and Computational Study into the Role of the Substituents at Boron

Maodie Wang<sup>a</sup>, M. Graça H. Vicente<sup>a</sup>, Deanna Mason<sup>b</sup>, and Petia Bobadova-Parvanova<sup>b\*</sup>

<sup>a</sup>Department of Chemistry, Louisiana State University, Baton Rouge, LA 70803, USA

<sup>b</sup>Department of Chemistry, Rockhurst University, Kansas City, MO 64110, USA

## Contents

|                                                                             |       |
|-----------------------------------------------------------------------------|-------|
| <sup>11</sup> B NMR Spectra.....                                            | S2    |
| Calculated Chemical Shifts.....                                             | S7    |
| <sup>1</sup> H NMR Spectra .....                                            | S9    |
| TLC Studies .....                                                           | S25   |
| Fluorescence Spectra .....                                                  | S26   |
| UV-Vis Spectra.....                                                         | S29   |
| Frontier Orbitals.....                                                      | S32   |
| Mass Spectrometry Studies .....                                             | S33   |
| Infrared Spectra .....                                                      | S37   |
| Optimized Cartesian Coordinates of BODIPYs and Hydrogen-bonded Complex..... | S4040 |

## $^{11}\text{B}$ NMR spectra

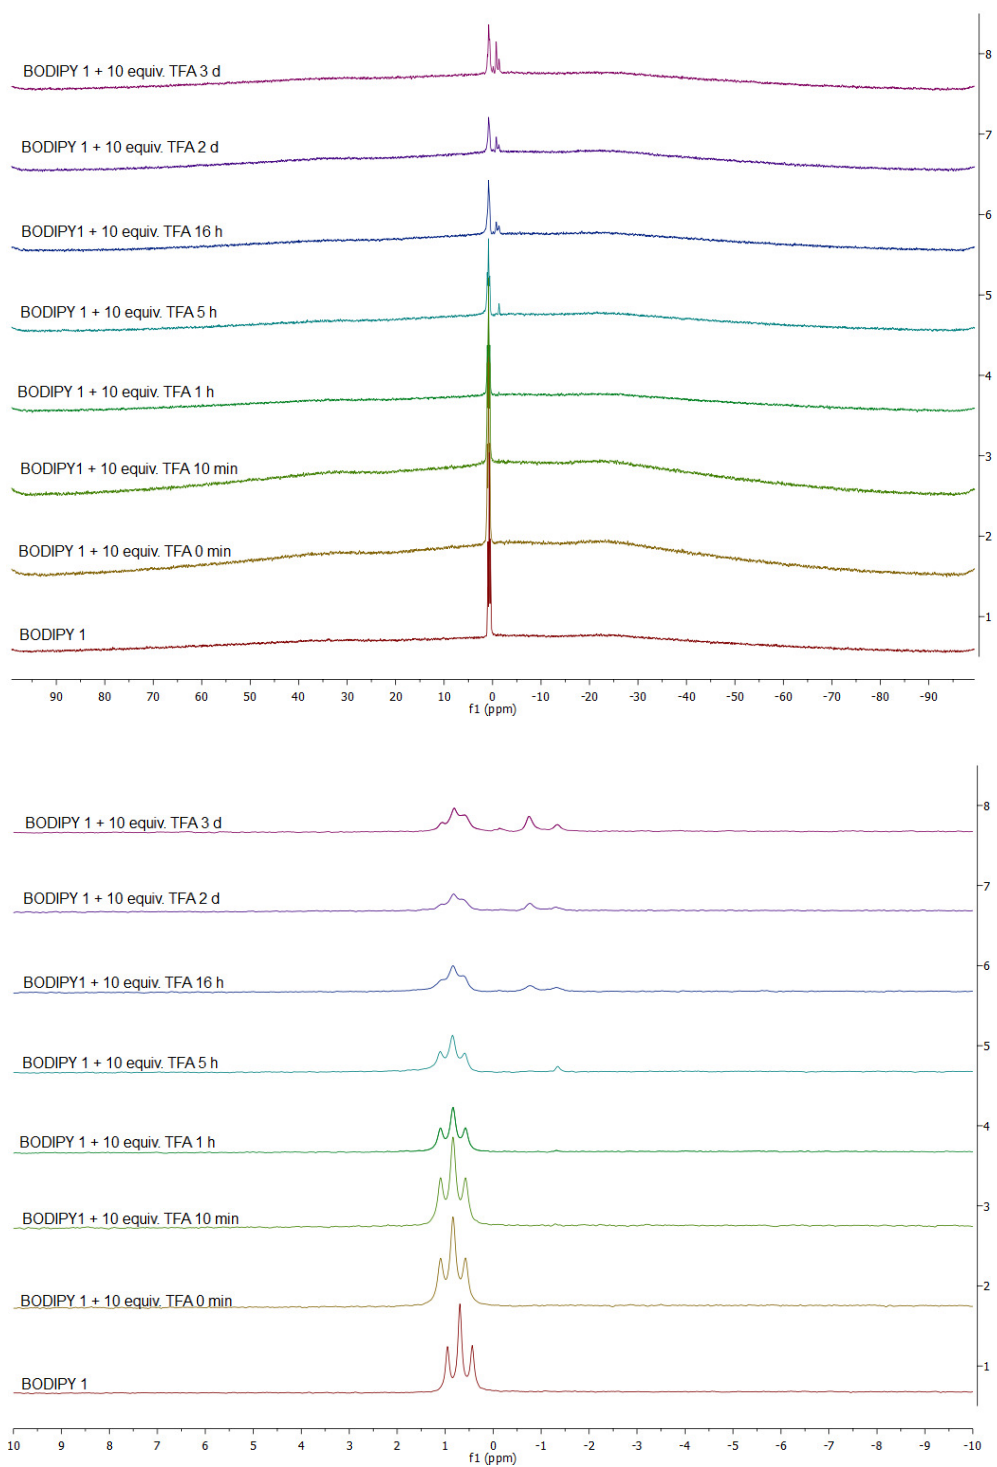

Figure S1.  $^{11}\text{B}$  NMR spectra of BODIPY 1 with 10 equivalents of trifluoroacetic acid in  $\text{CDCl}_3$ .

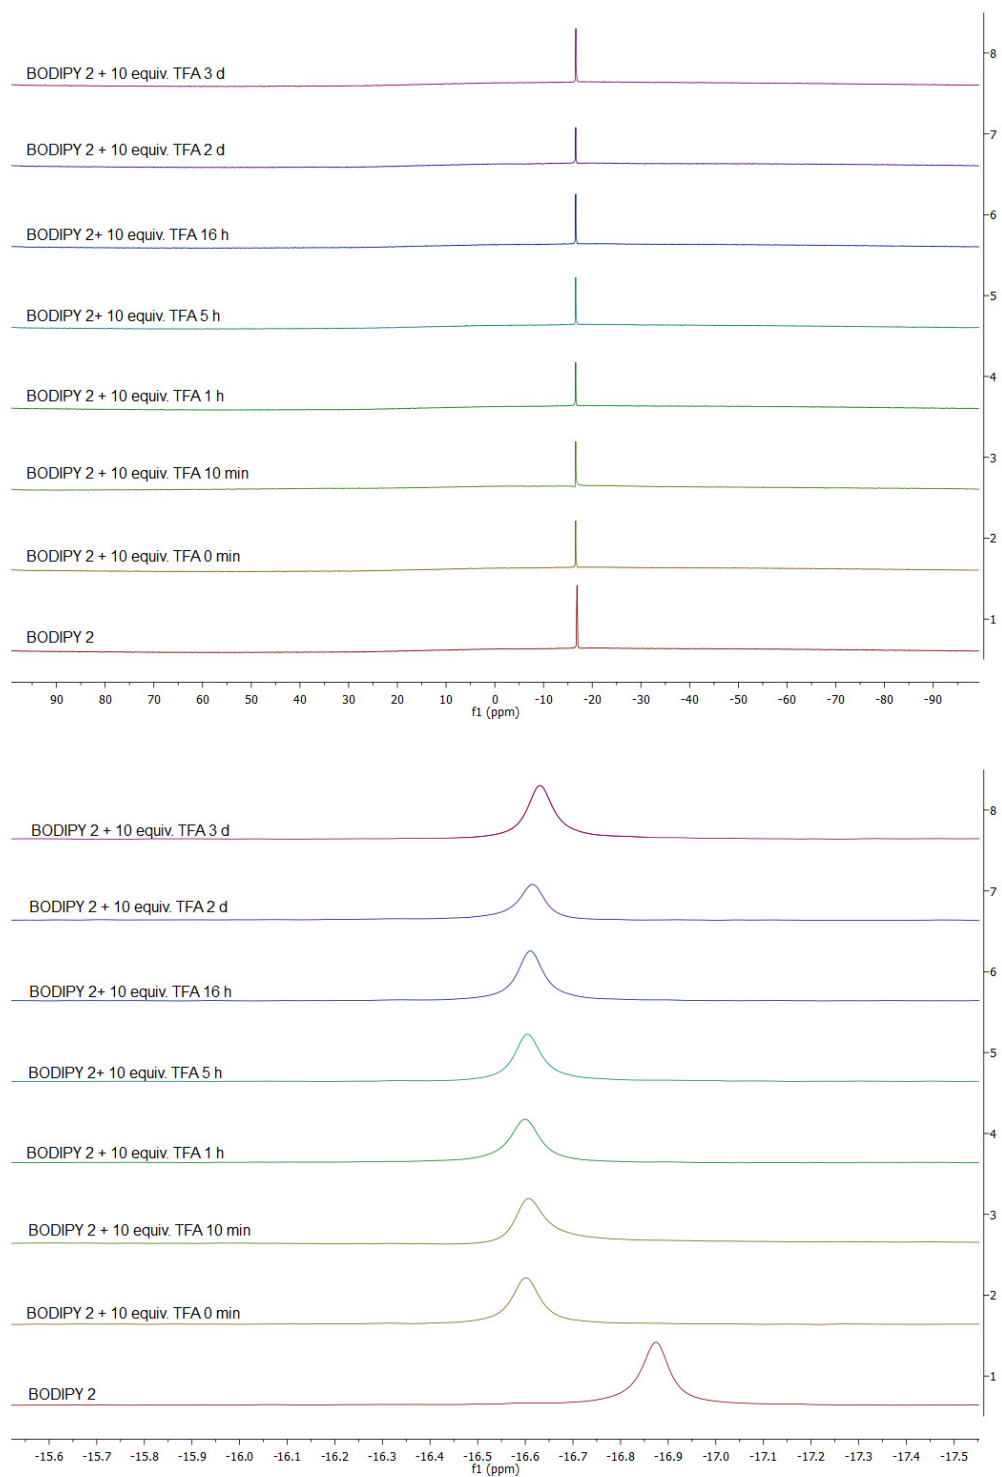

Figure S2.  $^{11}\text{B}$  NMR spectra of BODIPY 2 with 10 equivalents of trifluoroacetic acid in  $\text{CDCl}_3$ .

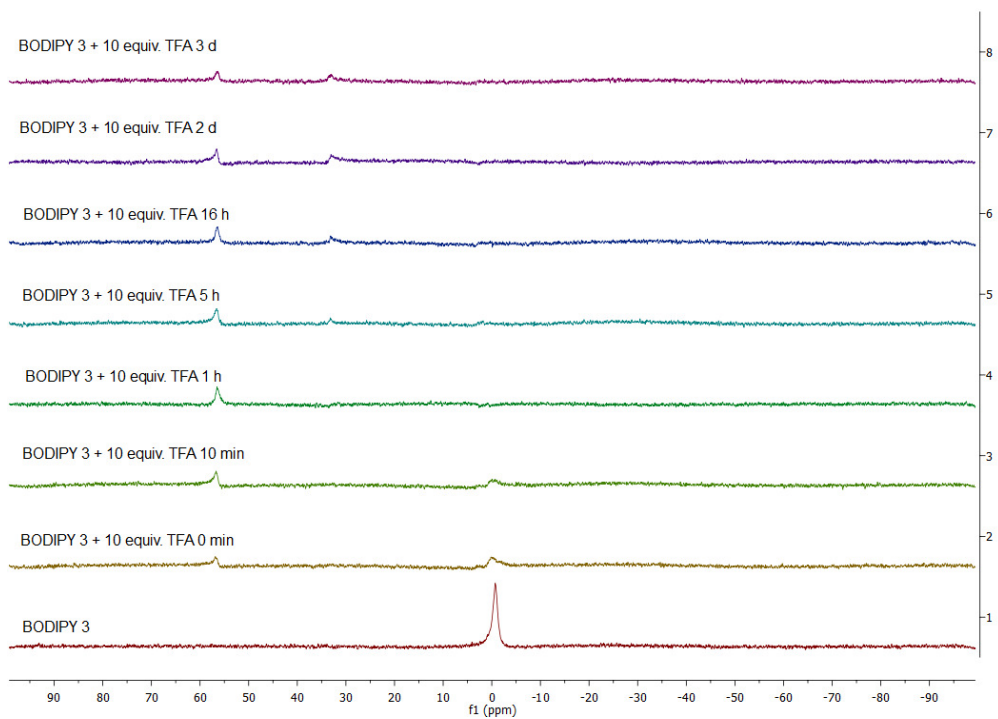

Figure S3.  $^{11}\text{B}$  NMR spectra of BODIPY 3 with 10 equivalents of trifluoroacetic acid in  $\text{CDCl}_3$ .

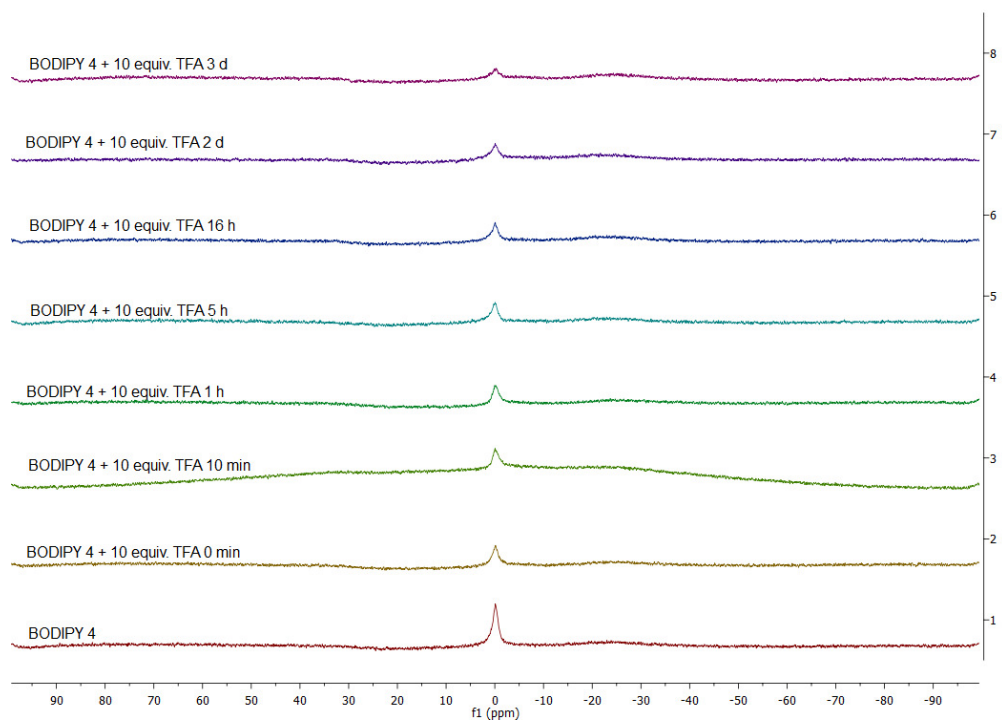

Figure S4.  $^{11}\text{B}$  NMR spectra of BODIPY 4 with 10 equivalents of trifluoroacetic acid in  $\text{CDCl}_3$ .

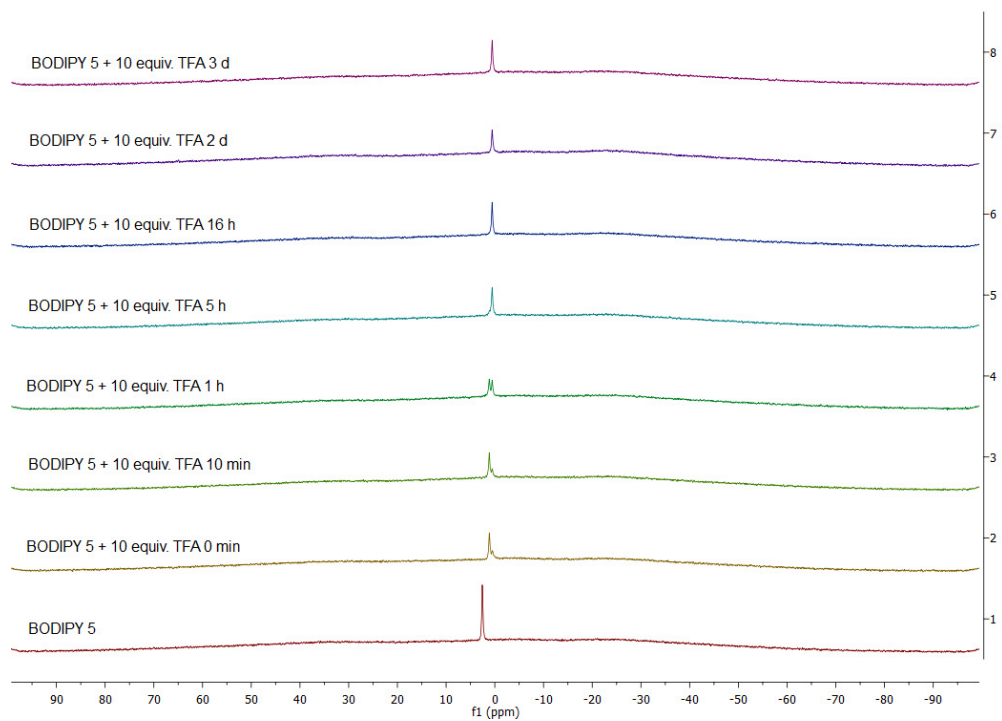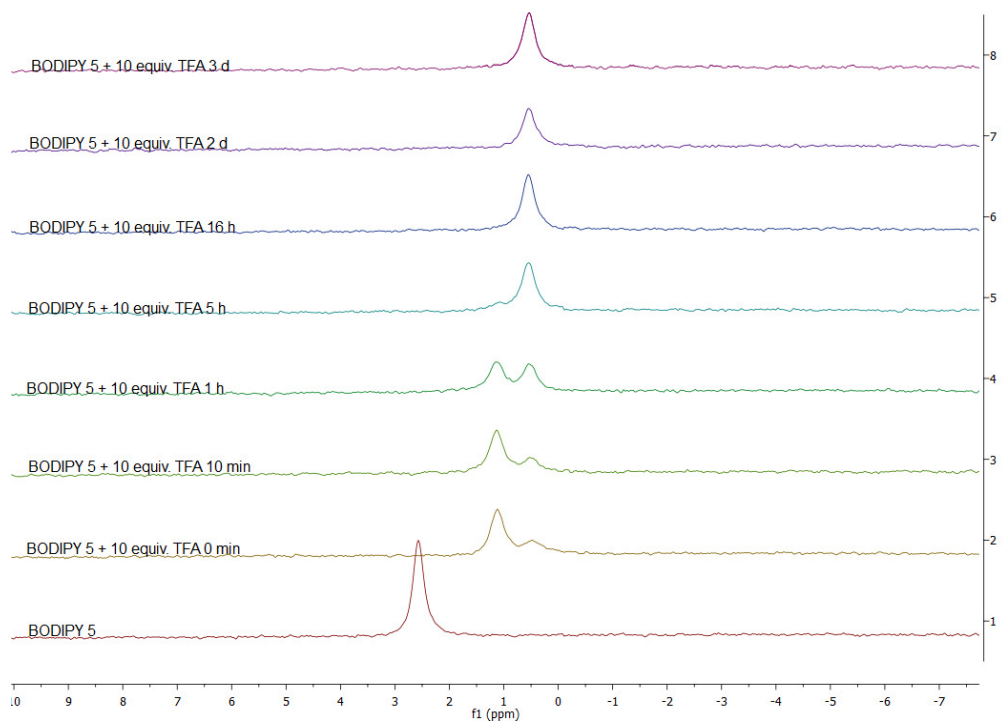

Figure S5.  $^{11}\text{B}$  NMR spectra of BODIPY 5 with 10 equivalents of trifluoroacetic acid in  $\text{CDCl}_3$ .

## Calculated Chemical Shifts

Table S1. B3LYP/6-31+G(d,p) calculated  $^{11}\text{B}$  chemical shift ( $\delta$ ) in  $\text{CDCl}_3$  for trivalent and tetravalent possible intermediates and products upon addition of TFA to BODIPYs 1-5.  $\text{BF}_3\text{OEt}_2$  is used as a reference.

| Possible products and intermediates                              | $^{11}\text{B}$ $\delta$ (ppm) | Possible products and intermediates                                                 | $^{11}\text{B}$ $\delta$ (ppm) |
|------------------------------------------------------------------|--------------------------------|-------------------------------------------------------------------------------------|--------------------------------|
| BX <sub>3</sub> (trivalent)                                      |                                | BX <sub>4</sub> (tetravalent)                                                       |                                |
| Simple B-containing compounds                                    |                                |                                                                                     |                                |
| BF <sub>2</sub> (O <sub>2</sub> CCF <sub>3</sub> )               | 10.47                          | [BF <sub>2</sub> (O <sub>2</sub> CCF <sub>3</sub> ) <sub>2</sub> ] <sup>-</sup>     | 1.04                           |
| BF(O <sub>2</sub> CCF <sub>3</sub> ) <sub>2</sub>                | 12.38                          | [BF(O <sub>2</sub> CCF <sub>3</sub> ) <sub>3</sub> ] <sup>-</sup>                   | 1.23                           |
| BCN <sub>2</sub> (O <sub>2</sub> CCF <sub>3</sub> )              | 14.39                          | [BCN <sub>2</sub> (O <sub>2</sub> CCF <sub>3</sub> ) <sub>2</sub> ] <sup>-</sup>    | -12.12                         |
| BMe <sub>2</sub> (O <sub>2</sub> CCF <sub>3</sub> )              | 56.29                          | [BMe <sub>2</sub> (O <sub>2</sub> CCF <sub>3</sub> ) <sub>2</sub> ] <sup>-</sup>    | 9.81                           |
| BPh <sub>2</sub> (O <sub>2</sub> CCF <sub>3</sub> ) <sub>2</sub> | 45.98                          | [BPh <sub>2</sub> (O <sub>2</sub> CCF <sub>3</sub> ) <sub>2</sub> ] <sup>-</sup>    | 8.28                           |
| B(OMe) <sub>2</sub> (OCOCF <sub>3</sub> )                        | 14.82                          | [B(OMe) <sub>2</sub> (O <sub>2</sub> CCF <sub>3</sub> ) <sub>2</sub> ] <sup>-</sup> | 2.75                           |
| B(O <sub>2</sub> CCF <sub>3</sub> ) <sub>3</sub>                 | 11.34                          | [B(O <sub>2</sub> CCF <sub>3</sub> ) <sub>4</sub> ] <sup>-</sup>                    | -0.75                          |
| BODIPYs                                                          |                                |                                                                                     |                                |
| [BODIPY-O <sub>2</sub> CCF <sub>3</sub> ] <sup>+</sup>           | 20.29                          | BODIPY-(O <sub>2</sub> CCF <sub>3</sub> ) <sub>2</sub>                              | -0.77                          |
| [BODIPY-F] <sup>+</sup>                                          | 18.12                          | BODIPY-F-O <sub>2</sub> CCF <sub>3</sub>                                            | 0.34                           |
| [BODIPY-CN] <sup>+</sup>                                         | 13.10                          | BODIPY-CN-O <sub>2</sub> CCF <sub>3</sub>                                           | -8.04                          |
| [BODIPY-Me] <sup>+</sup>                                         | 31.88                          | BODIPY-Me-O <sub>2</sub> CCF <sub>3</sub>                                           | 2.23                           |
| [BODIPY-Ph] <sup>+</sup>                                         | 28.51                          | BODIPY-Ph-O <sub>2</sub> CCF <sub>3</sub>                                           | -0.29                          |
| [BODIPY-OMe] <sup>+</sup>                                        | 17.86                          | BODIPY-OMe-O <sub>2</sub> CCF <sub>3</sub>                                          | 0.72                           |

Table S2. B3LYP/6-31+G(d,p) calculated  $^{11}\text{B}$  and  $^1\text{H}$  chemical shift ( $\delta$ ) in  $\text{CDCl}_3$  for hydrogen-bonded complexes between TFA and BODIPYs **1-5**.  $\text{BF}_3\text{OEt}_2$  is used as a reference for  $^{11}\text{B}$  and TMS if used as a reference for  $^1\text{H}$ .

| Hydrogen bonded complex               | $^{11}\text{B}$ $\delta$ (ppm) | $^1\text{H}$ $\delta$ (ppm) |
|---------------------------------------|--------------------------------|-----------------------------|
| BODIPY <b>1</b> ...THF                | 1.67                           | 11.31                       |
| BODIPY <b>2</b> ...THF                | -17.95                         | 12.13                       |
| BODIPY <b>2</b> ...(THF) <sub>2</sub> | -17.14                         | 11.92/11.85                 |
| BODIPY <b>4</b> ...THF                | -2.85                          | 6.69                        |
| BODIPY <b>5</b> ...THF                | 0.64                           | 16.69                       |



## $^1\text{H}$ NMR Spectra

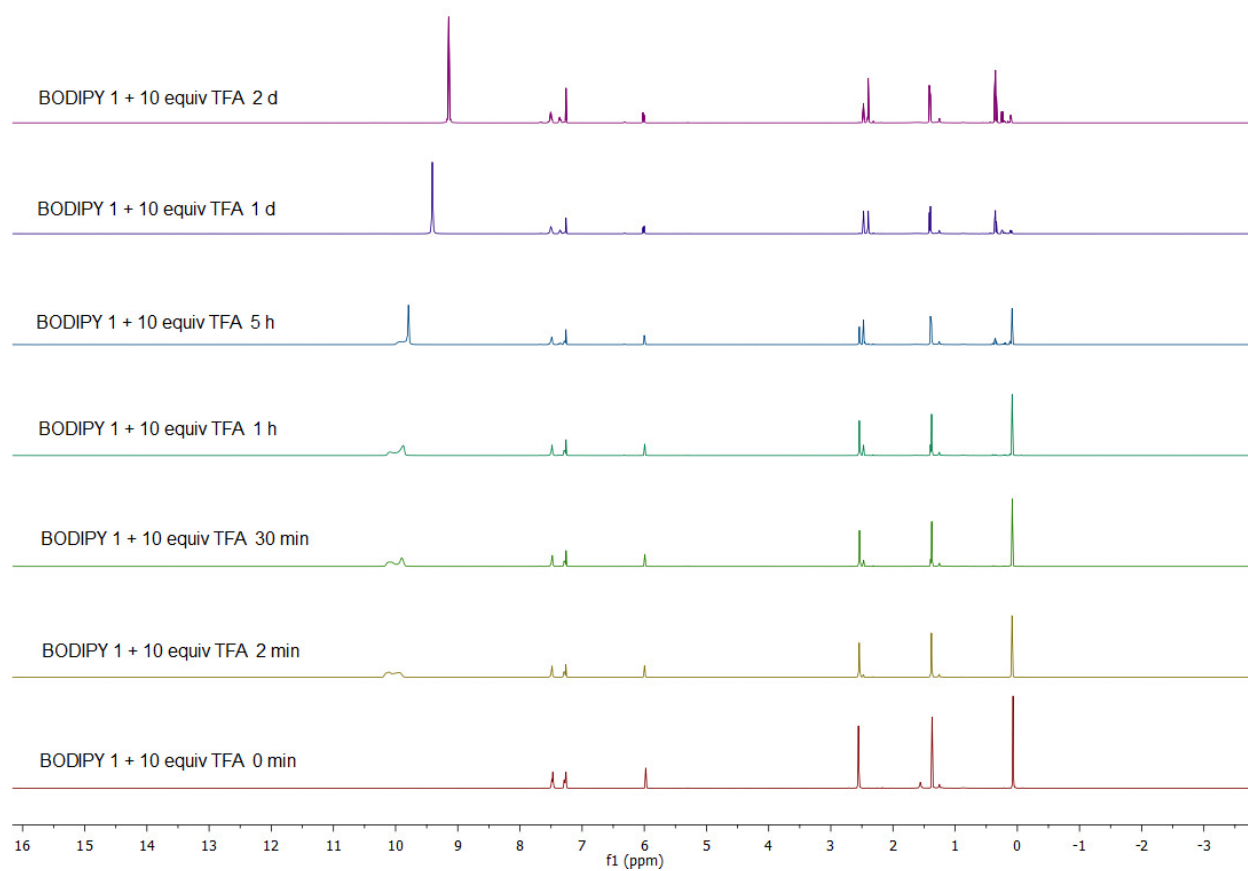

Figure S6.  $^1\text{H}$  NMR spectra of BODIPY 1 with 10 equivalents of trifluoroacetic acid in  $\text{CDCl}_3$ .

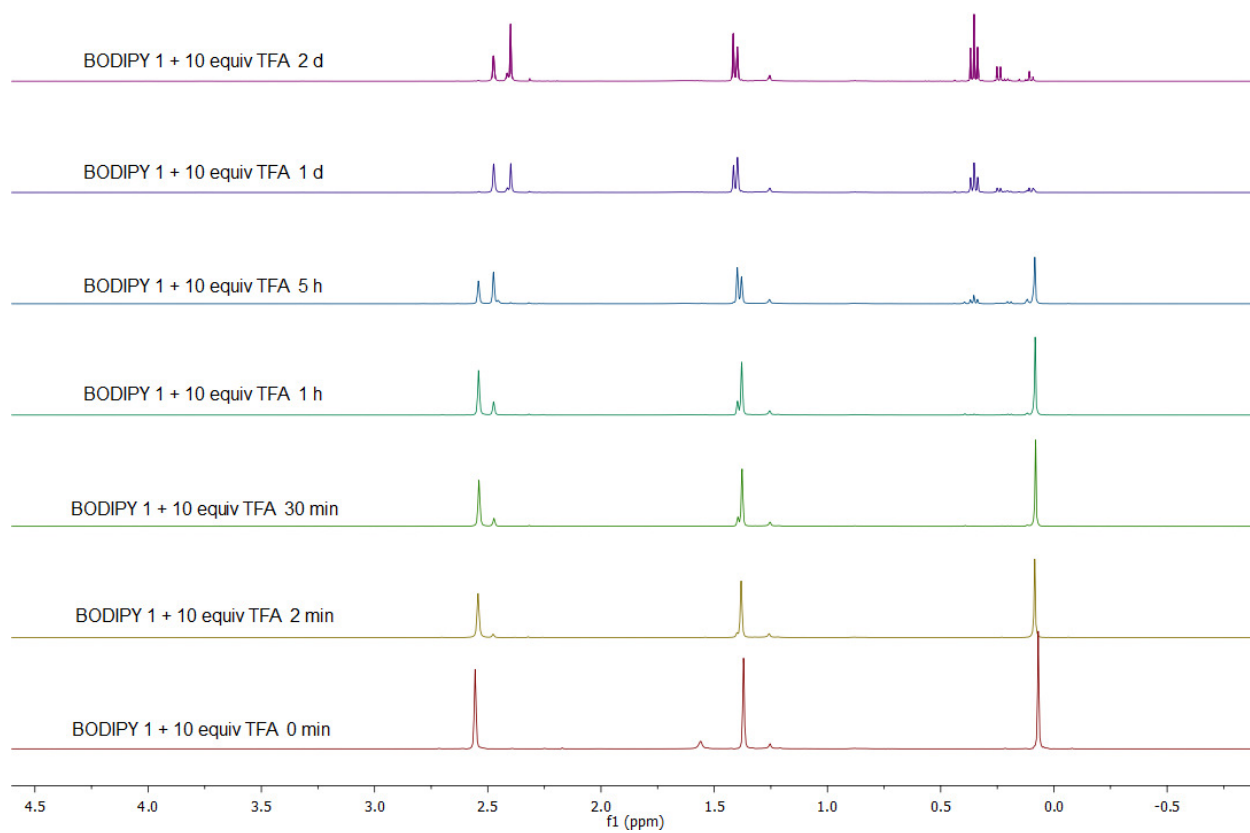

Figure S7. <sup>1</sup>H NMR spectra of BODIPY **1** with 10 equivalents of trifluoroacetic acid in CDCl<sub>3</sub>.

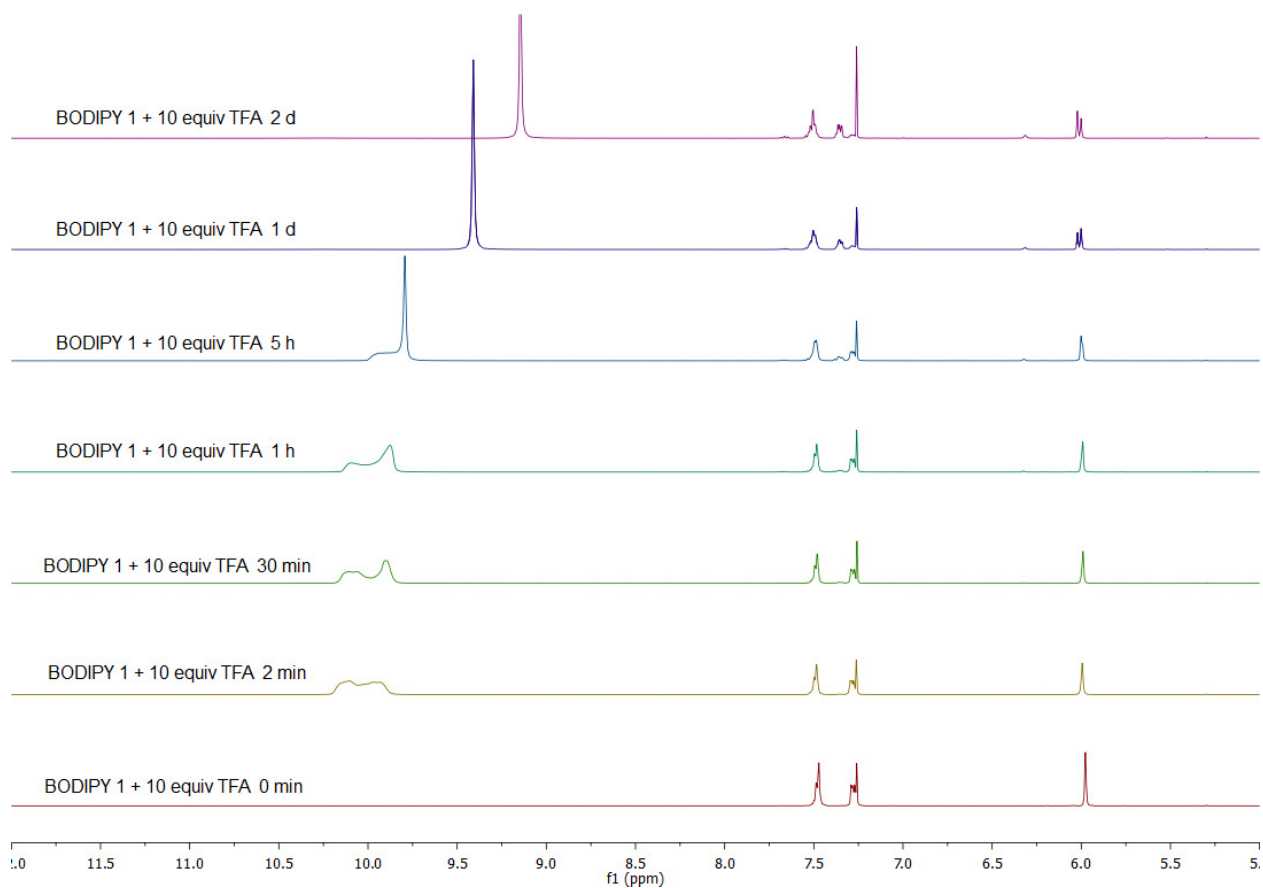

Figure S8.  $^1\text{H}$  NMR spectra of BODIPY 1 with 10 equivalents of trifluoroacetic acid in  $\text{CDCl}_3$ .

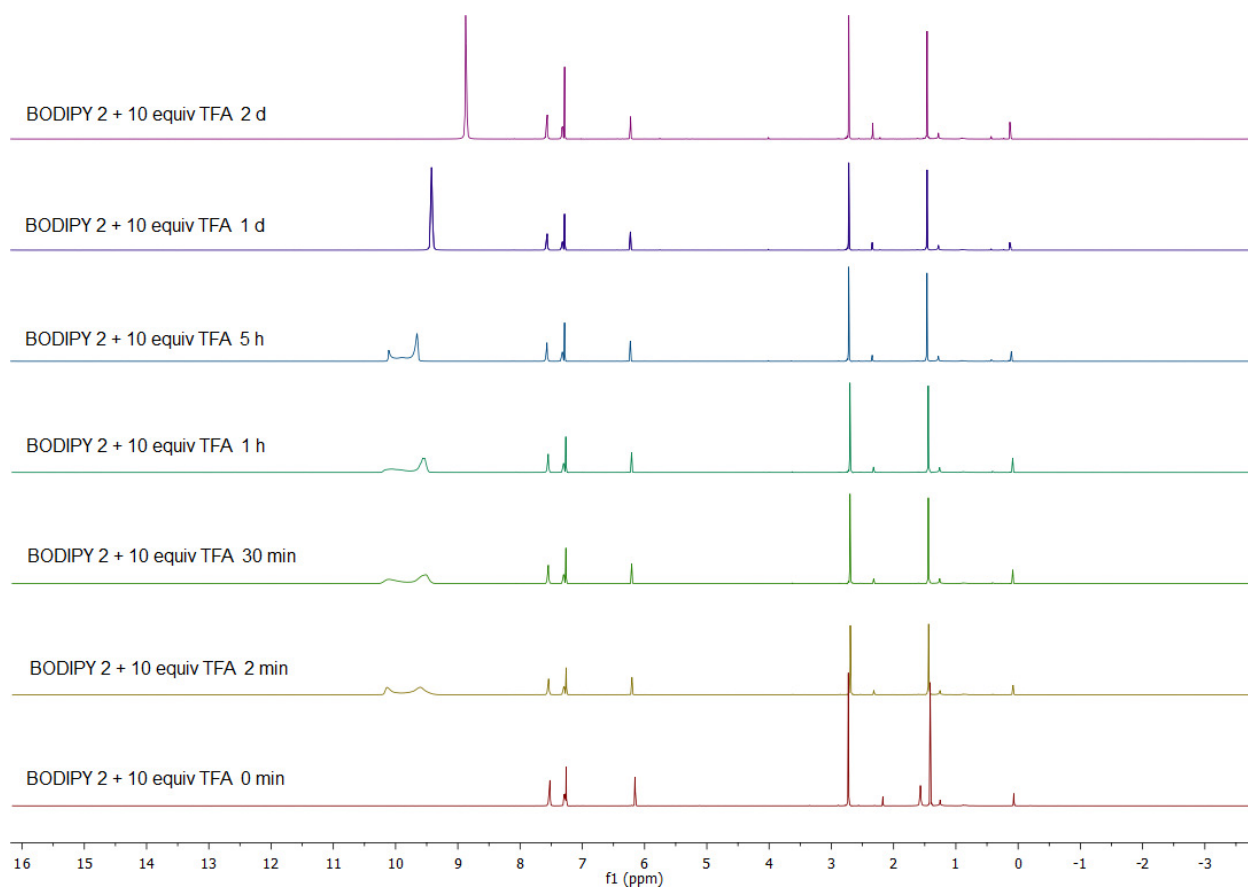

Figure S9.  $^1\text{H}$  NMR spectra of BODIPY 2 with 10 equivalents of trifluoroacetic acid in  $\text{CDCl}_3$ .

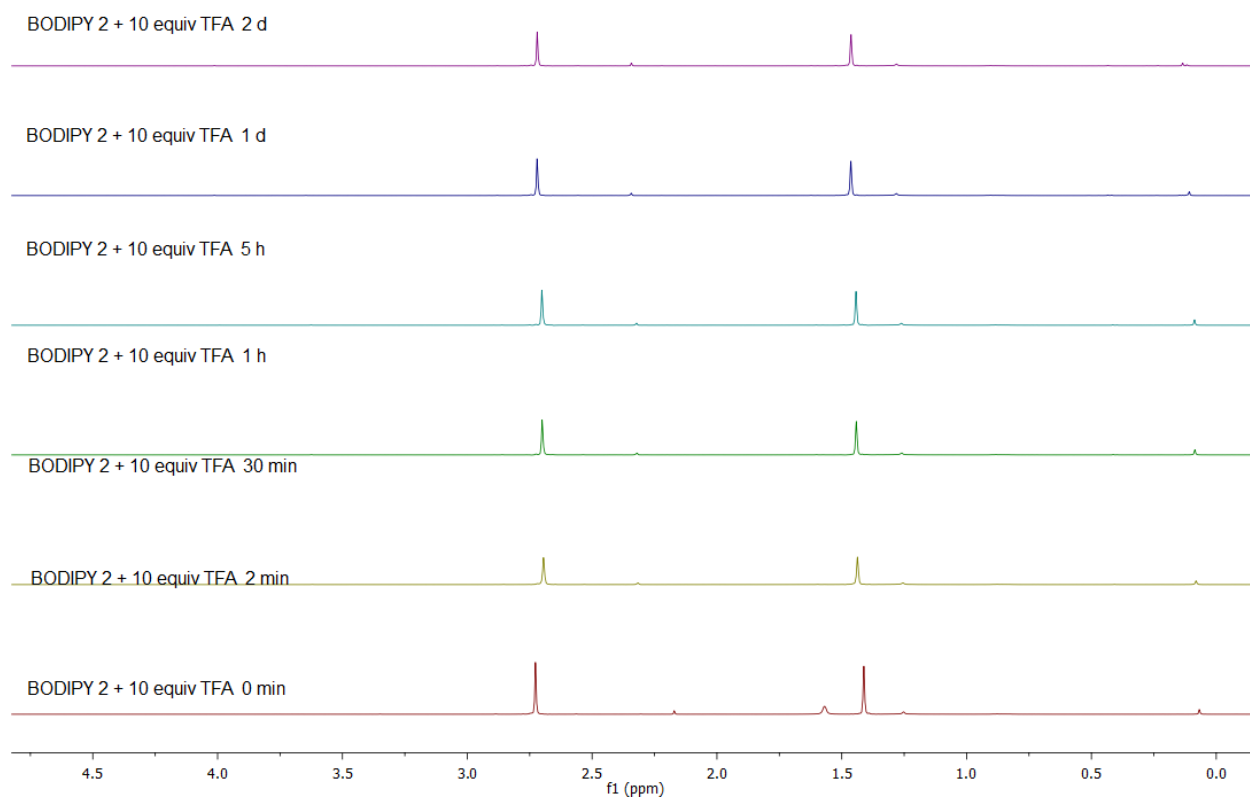

*Figure S10.  $^1\text{H}$  NMR spectra of BODIPY 2 with 10 equivalents of trifluoroacetic acid in  $\text{CDCl}_3$ .*

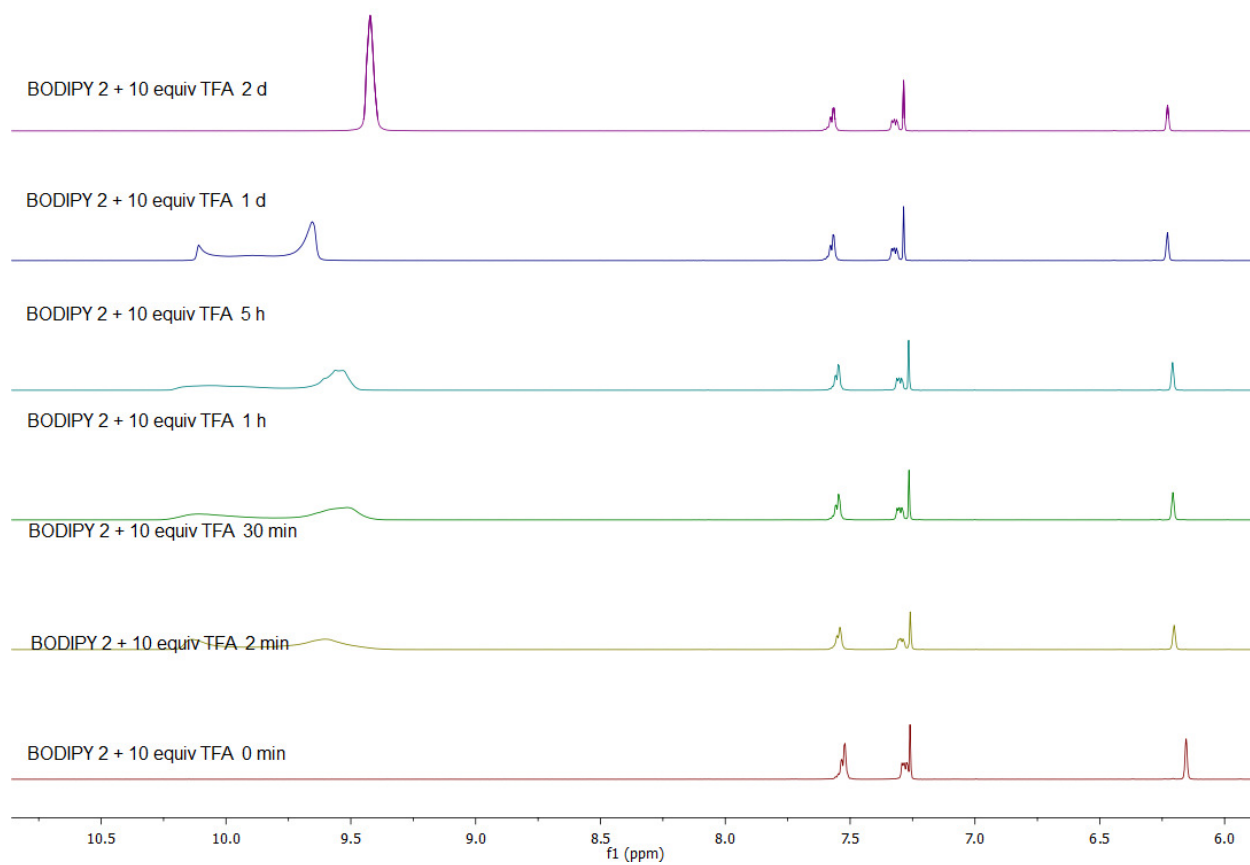

Figure S11.  $^1\text{H}$  NMR spectra of BODIPY 2 with 10 equivalents of trifluoroacetic acid in  $\text{CDCl}_3$ .

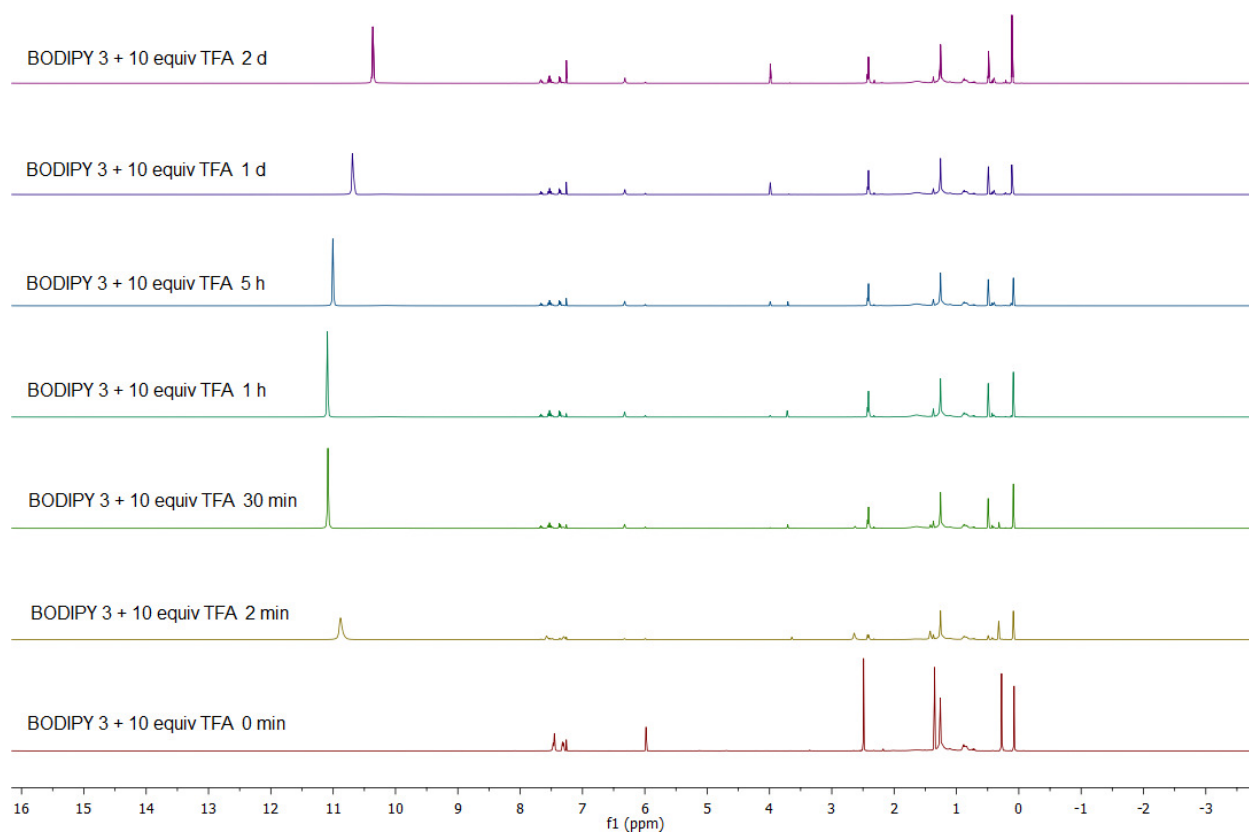

Figure S12.  $^1\text{H}$  NMR spectra of BODIPY **3** with 10 equivalents of trifluoroacetic acid in  $\text{CDCl}_3$ .

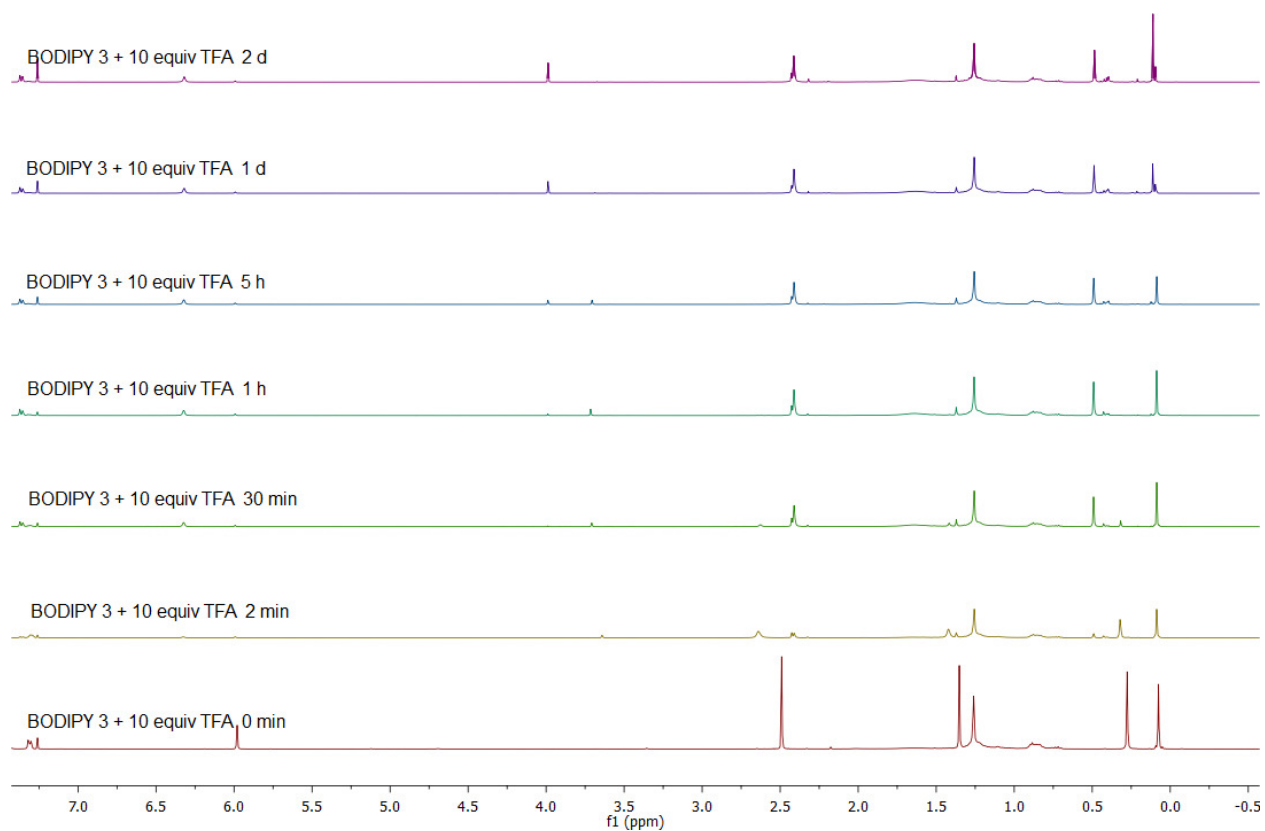

Figure S13.  $^1\text{H}$  NMR spectra of BODIPY 3 with 10 equivalents of trifluoroacetic acid in  $\text{CDCl}_3$ .



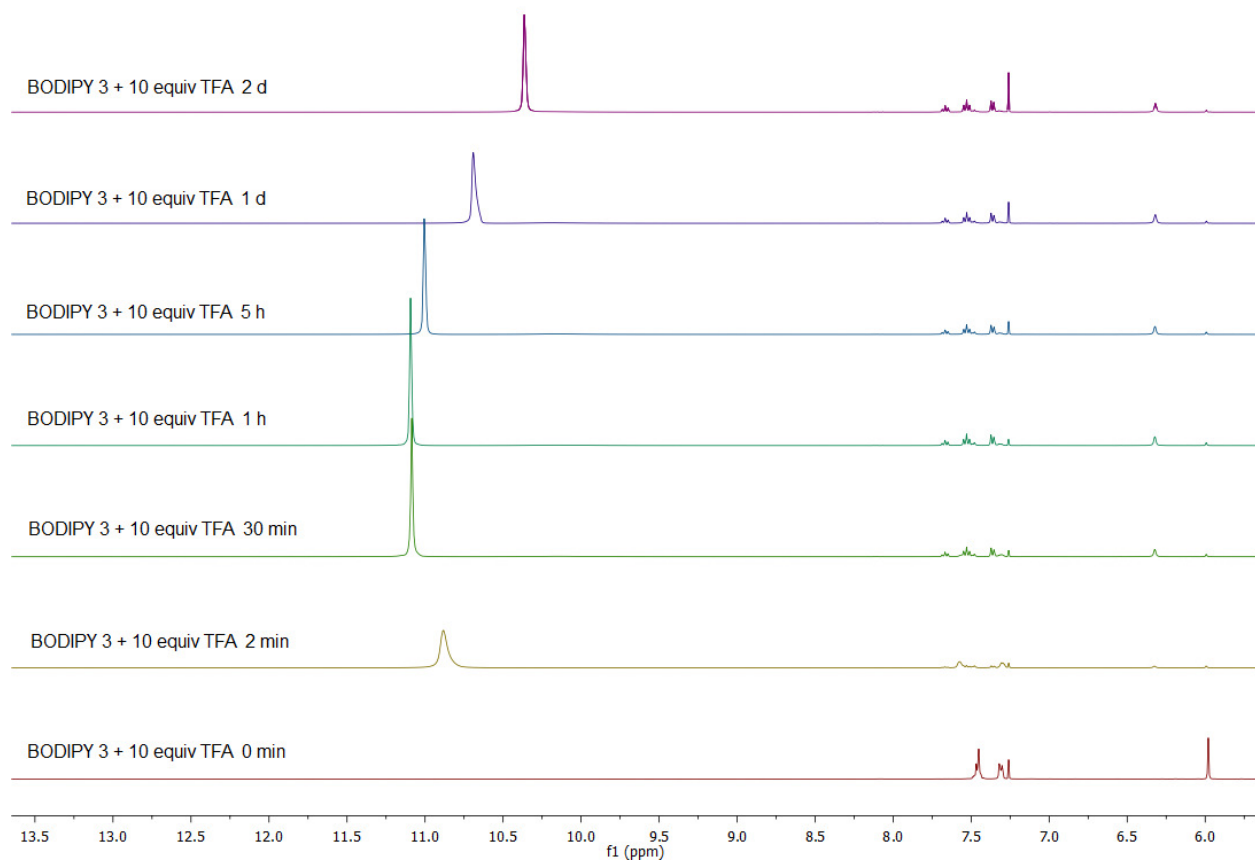

Figure S14.  $^1\text{H}$  NMR spectra of BODIPY 3 with 10 equivalents of trifluoroacetic acid in  $\text{CDCl}_3$ .

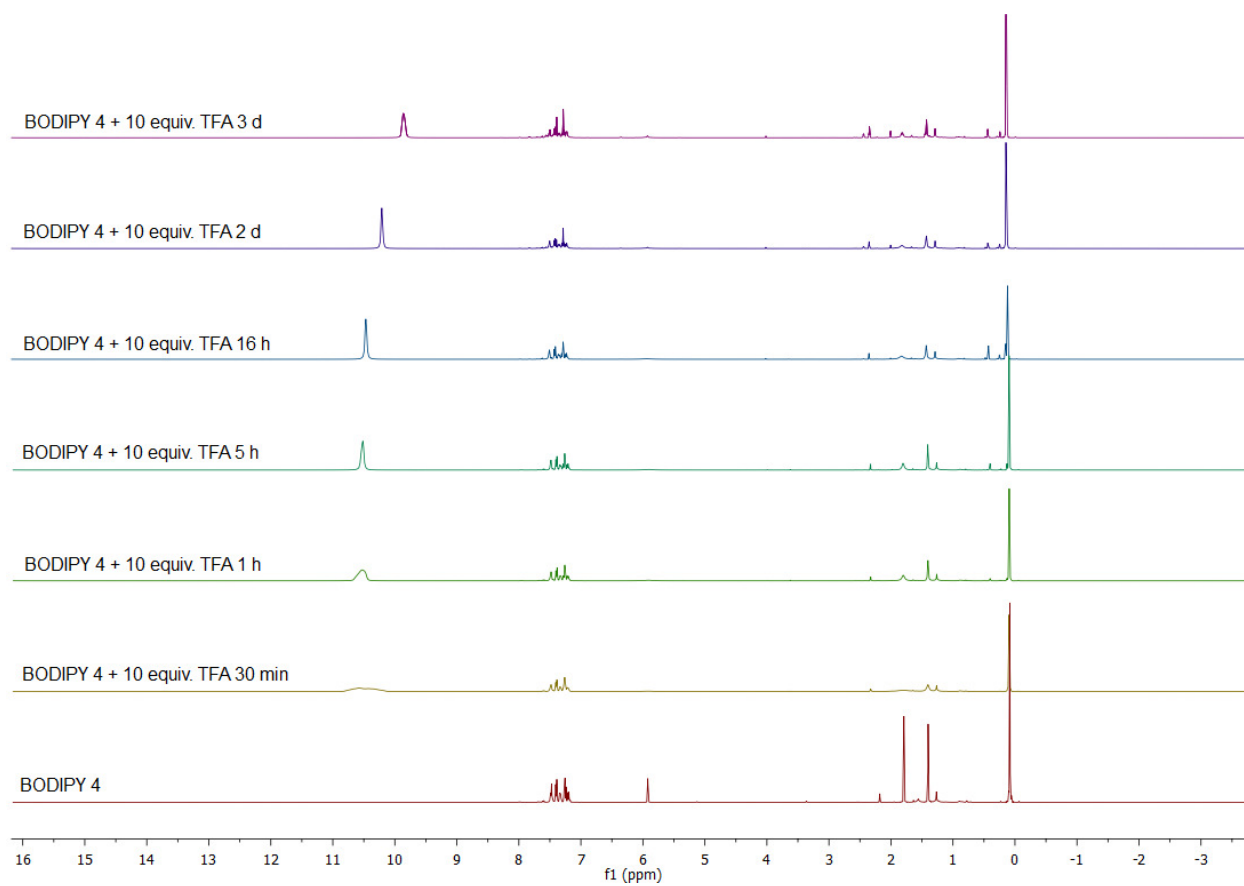

Figure S15. <sup>1</sup>H NMR spectra of BODIPY 4 with 10 equivalents of trifluoroacetic acid in CDCl<sub>3</sub>.

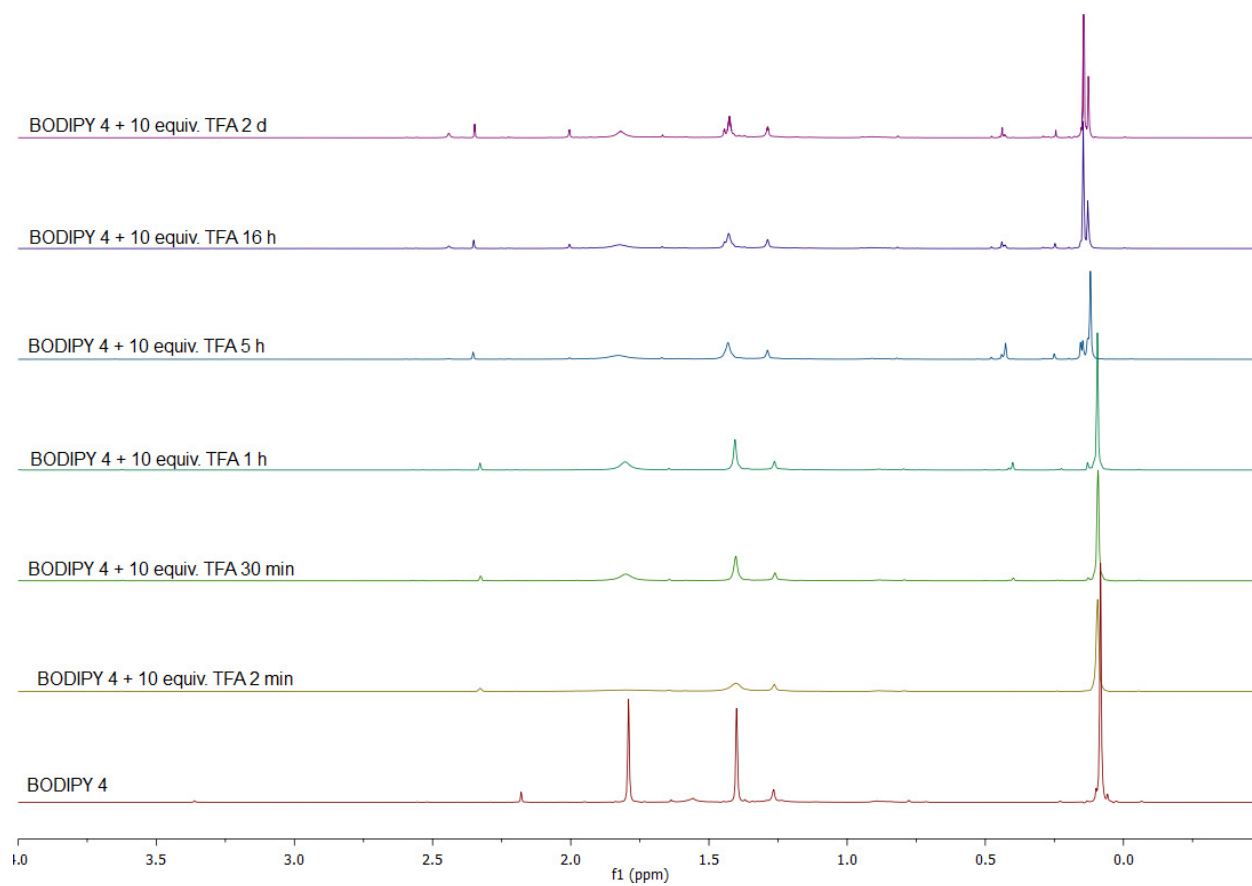

*Figure S16. <sup>1</sup>H NMR spectra of BODIPY 4 with 10 equivalents of trifluoroacetic acid in CDCl<sub>3</sub>.*

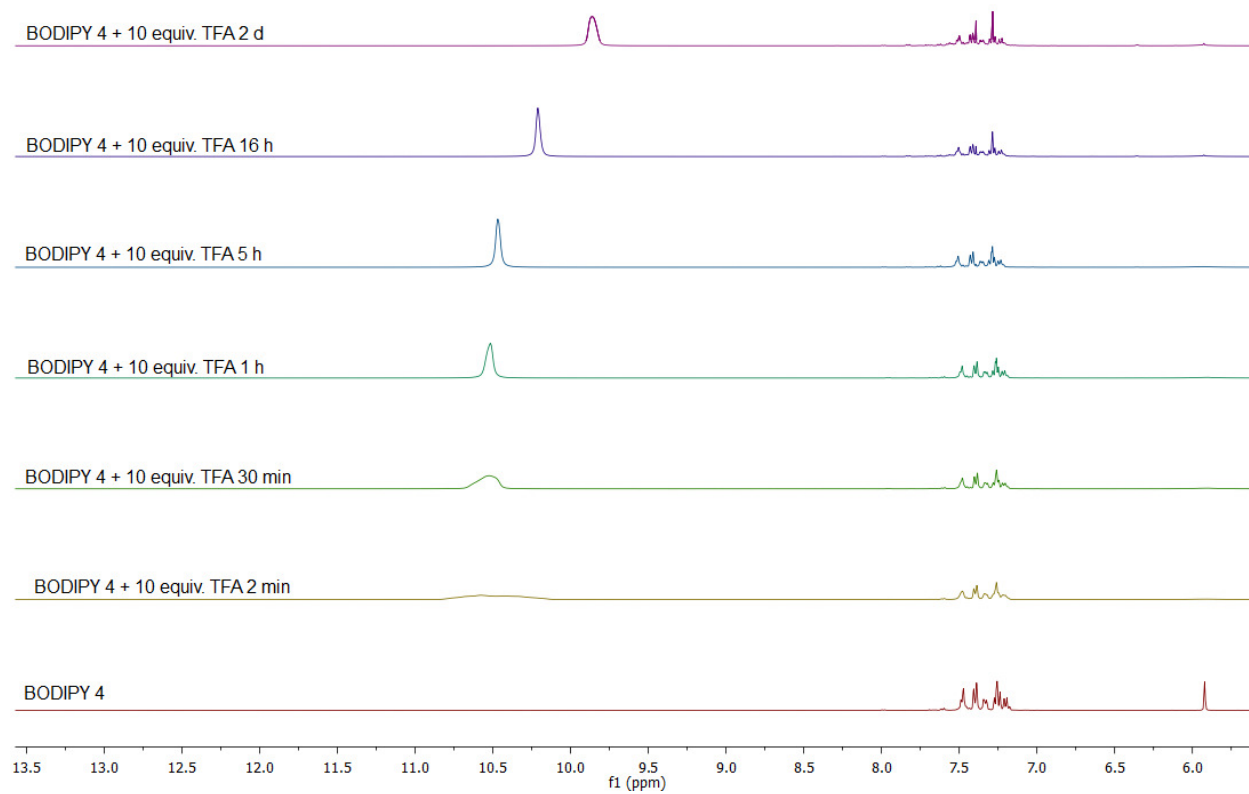

*Figure S17. <sup>1</sup>H NMR spectra of BODIPY 4 with 10 equivalents of trifluoroacetic acid in CDCl<sub>3</sub>.*

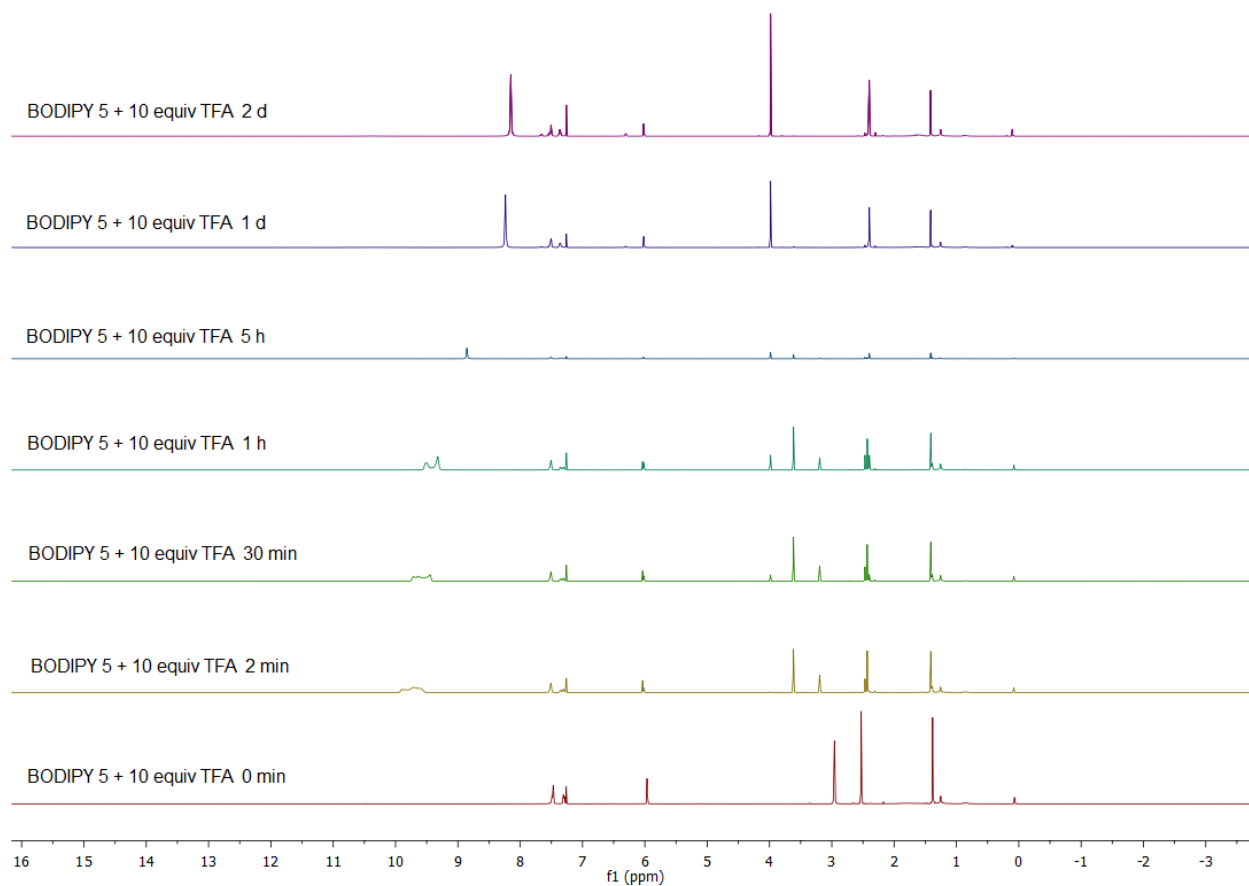

*Figure S18.  $^1\text{H}$  NMR spectra of BODIPY 5 with 10 equivalents of trifluoroacetic acid in  $\text{CDCl}_3$ .*

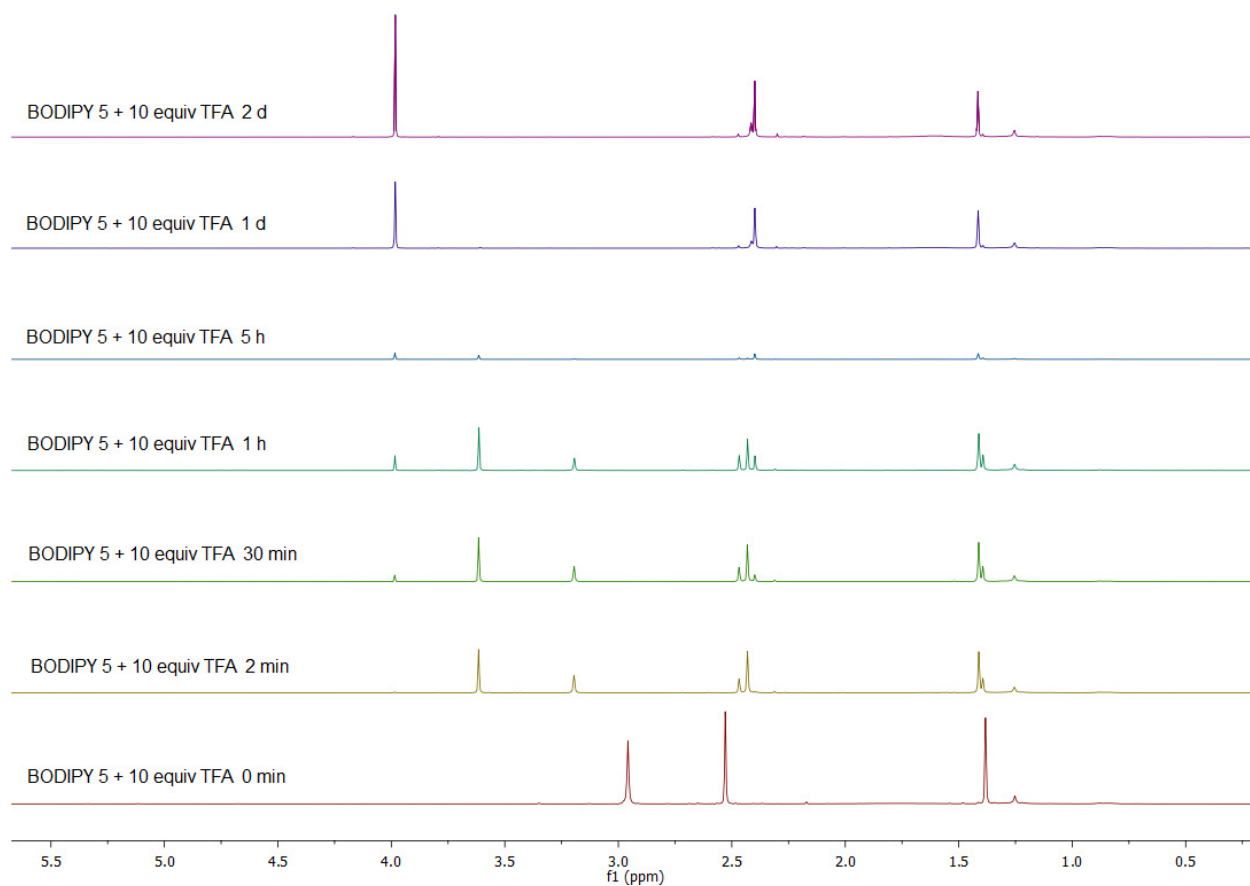

*Figure S19.  $^1\text{H}$  NMR spectra of BODIPY 5 with 10 equivalents of trifluoroacetic acid in  $\text{CDCl}_3$ .*

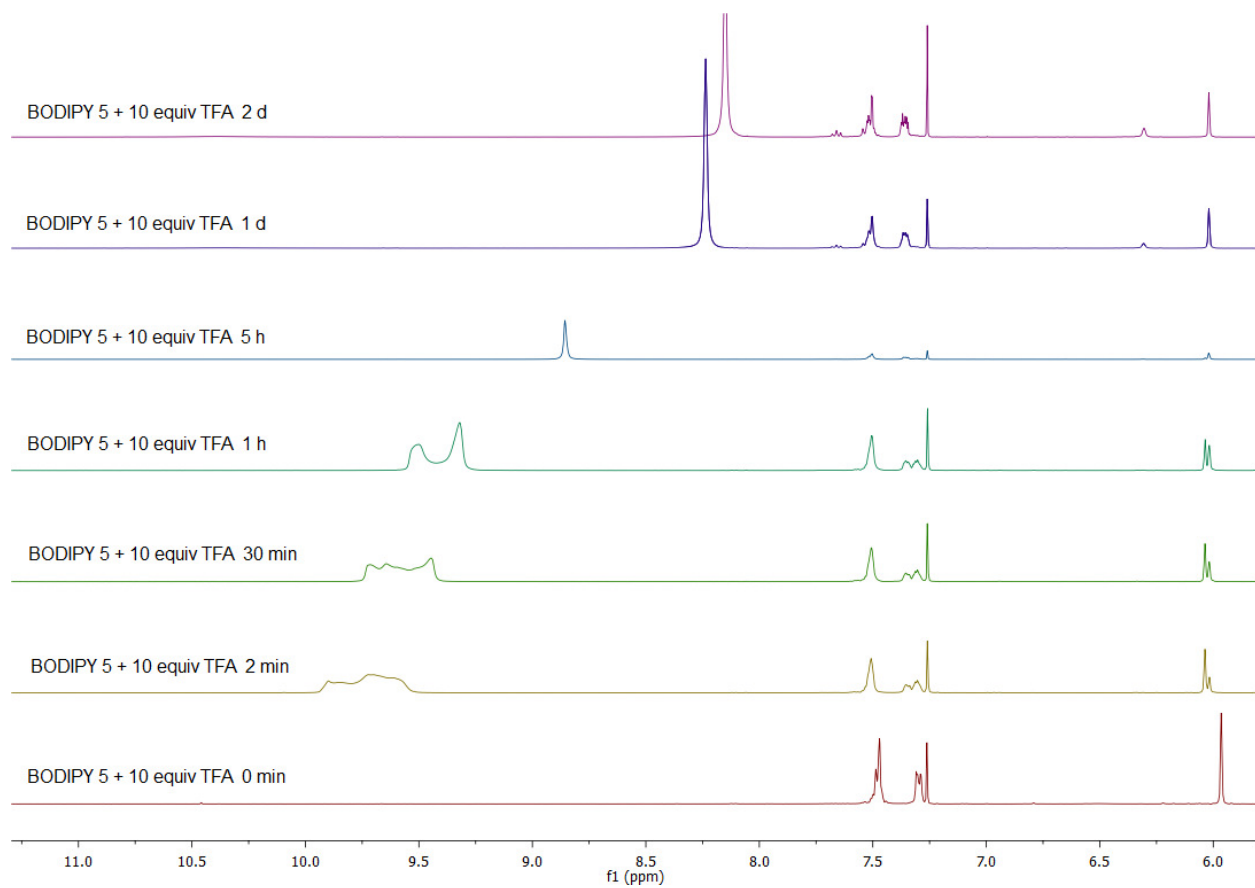

Figure S20.  $^1\text{H}$  NMR spectra of BODIPY 5 with 10 equivalents of trifluoroacetic acid in  $\text{CDCl}_3$ .

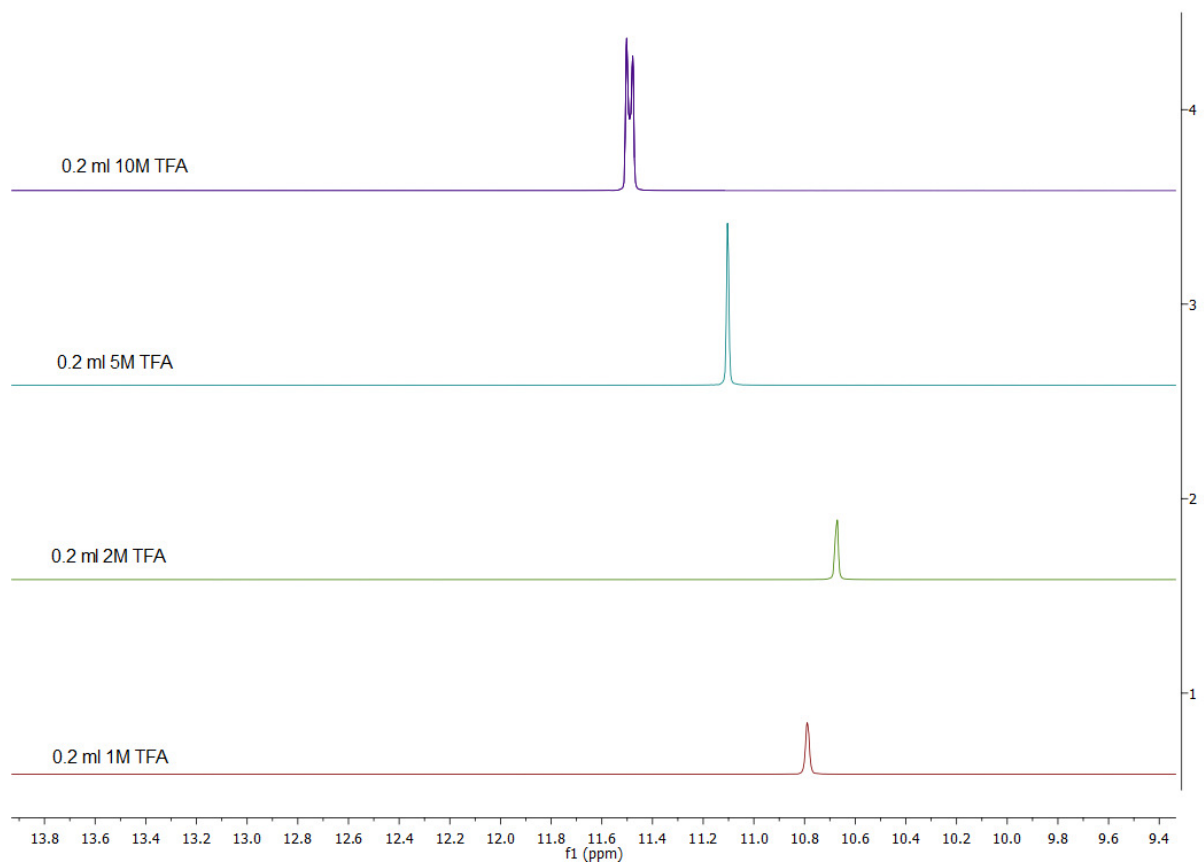

Figure S21.  $^1\text{H}$  NMR spectra of 0.3 M, 0.7 M, 1.7 M, and 3.3 M trifluoroacetic acid in  $\text{CDCl}_3$ .



## TLC Studies

Developing solvent: DCM:hexane=1:1

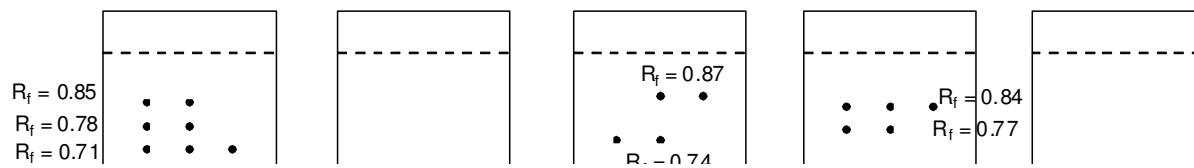

Figure S22. TLC analysis of BODIPY **1-5** and three days after the addition of TFA BODIPY **1'-5'**

## Fluorescence Spectra

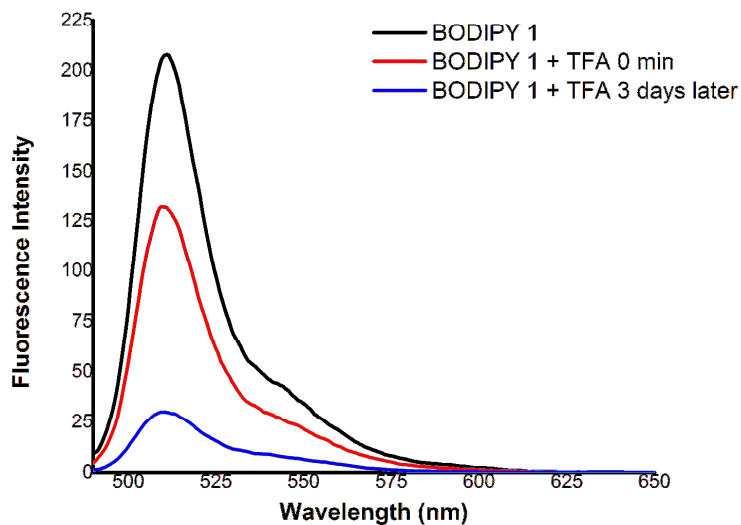

Figure S23. Fluorescence spectra of BODIPY 1 (black) in THF; BODIPY 1 upon addition (red) with addition of 10 equivalents of TFA and after three days (blue) in THF.

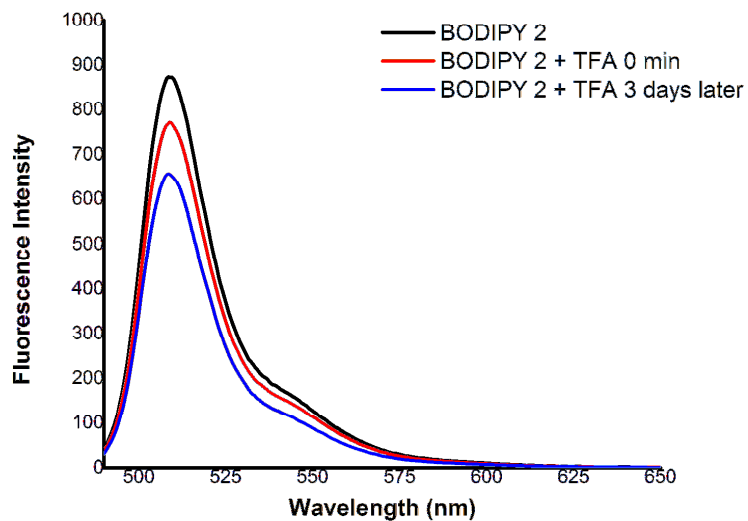

Figure S24. Fluorescence spectra of BODIPY 2 (black) in THF; BODIPY 2 upon addition (red) with addition of 10 equivalents of TFA and after three days (blue) in THF.

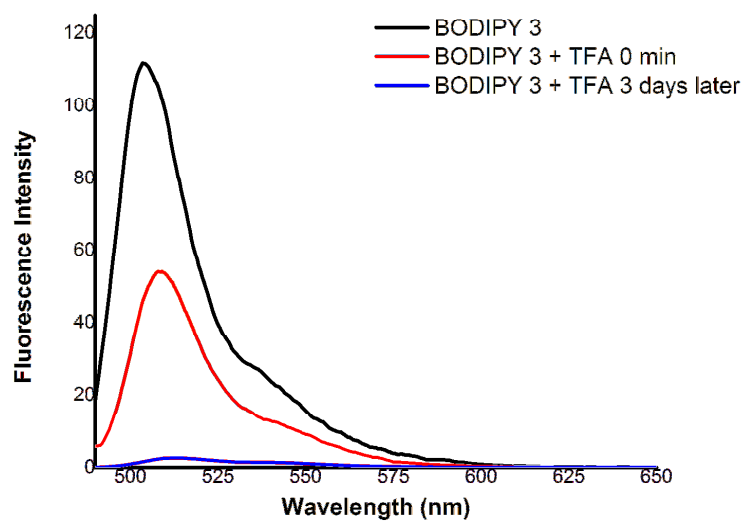

Figure S25. Fluorescence spectra of BODIPY 3 (black) in THF; BODIPY 3 upon addition (red) with addition of 10 equivalents of TFA and after three days (blue) in THF.

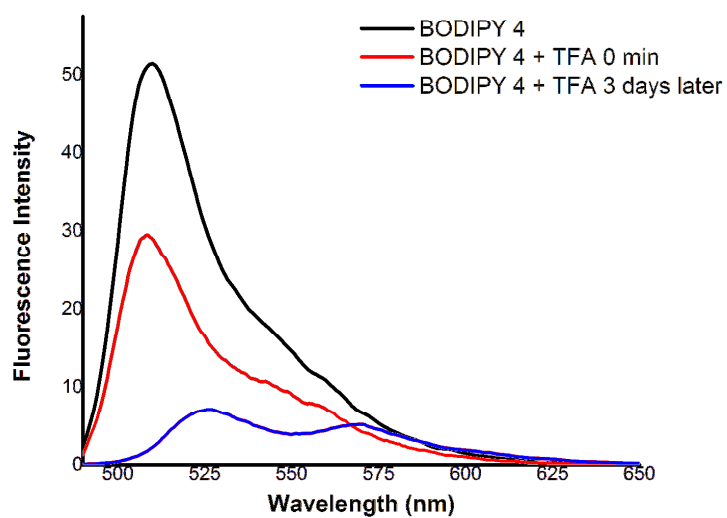

Figure S26. Fluorescence spectra of BODIPY 4 (black) in THF; BODIPY 4 upon addition (red) with addition of 10 equivalents of TFA and after three days (blue) in THF.

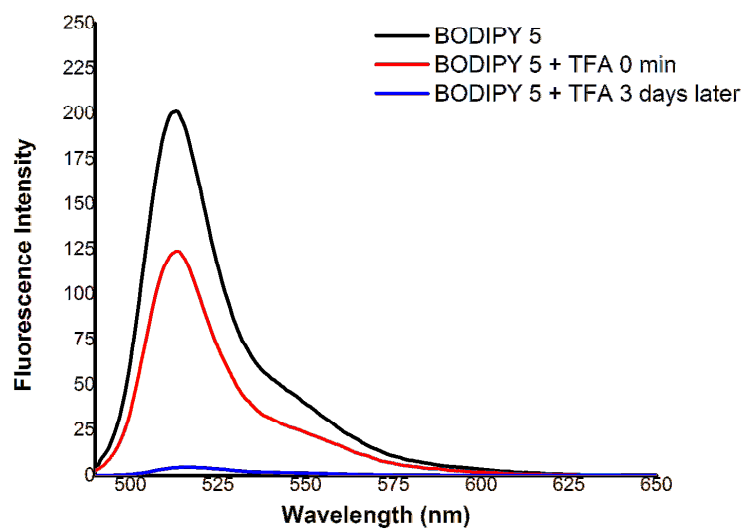

Figure S27. Fluorescence spectra of BODIPY 5 (black) in THF; BODIPY 5 upon addition (red) with addition of 10 equivalents of TFA and after three days (blue) in THF.

## UV-Vis Spectra

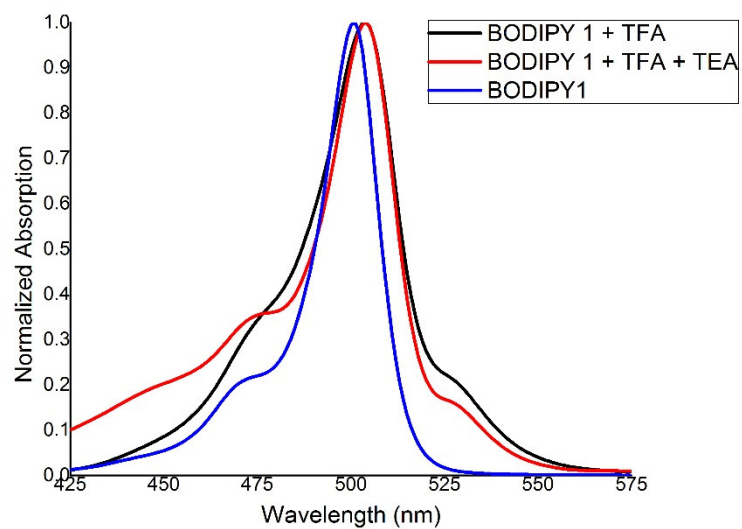

*Figure S28. Normalized UV-vis spectra of BODIPY 1 (blue) in THF; BODIPY 1 with addition of 10 equivalents of TFA after three days (black) in THF; neutralized sample with excess amount of triethylamine (red).*

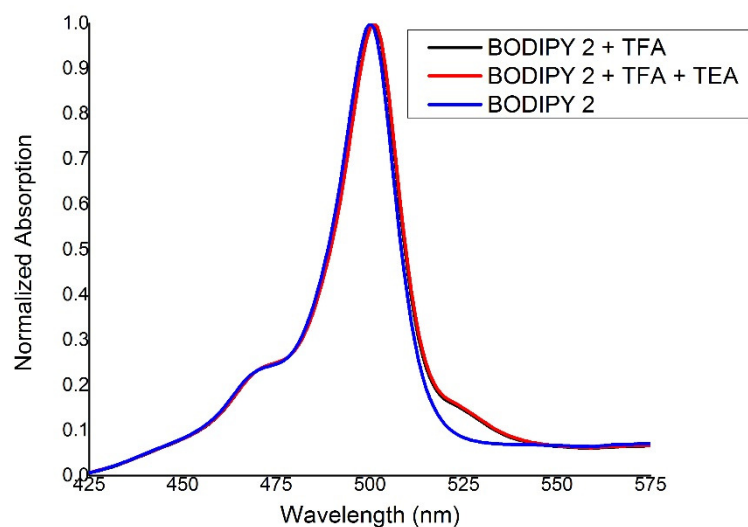

Figure S29. Normalized UV-vis spectra of BODIPY **2** (blue) in THF; BODIPY **2** with addition of 10 equivalents of TFA after three days (black) in THF; neutralized sample with excess amount of triethylamine (red).

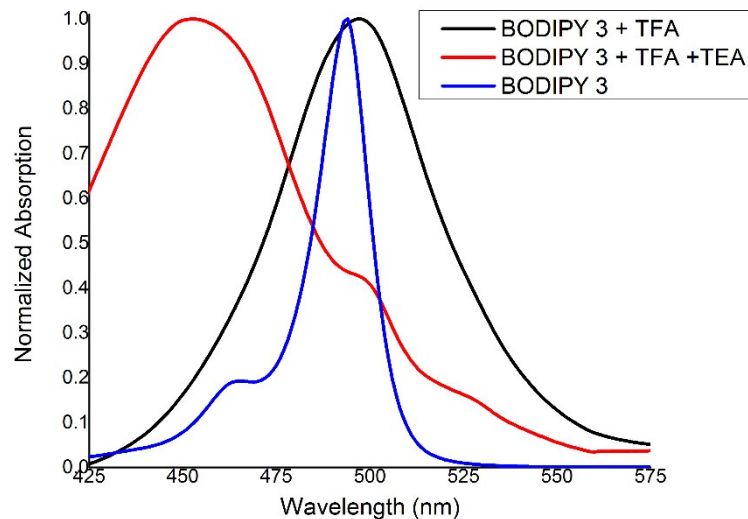

Figure S30. Normalized UV-vis spectra of BODIPY **3** (blue) in THF; BODIPY **3** with addition of 10 equivalents of TFA after three days (black) in THF; neutralized sample with excess amount of triethylamine (red).

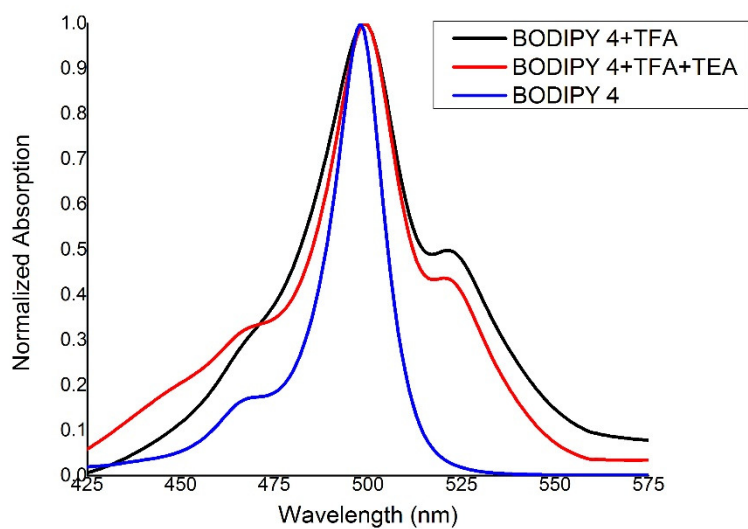

Figure S31. Normalized UV-vis spectra of BODIPY 4 (blue) in THF; BODIPY 4 with addition of 10 equivalents of TFA after three days (black) in THF; neutralized sample with excess amount of triethylamine (red).

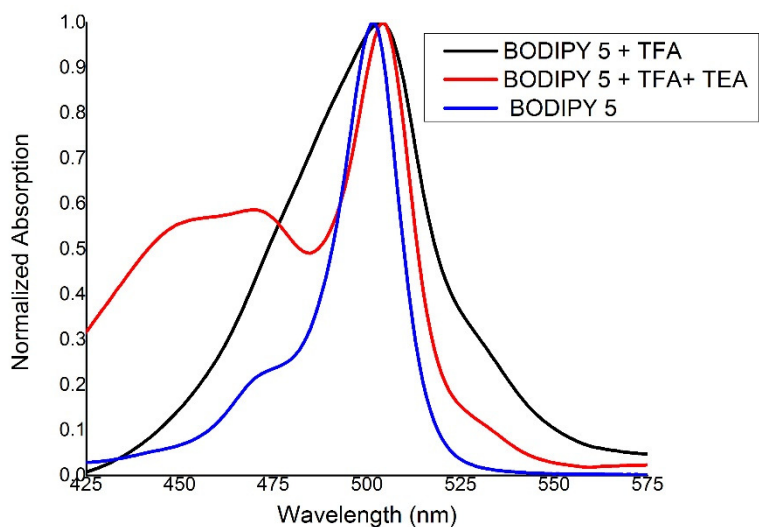

Figure S32. Normalized UV-vis spectra of BODIPY 5 (blue) in THF; BODIPY 5 with addition of 10 equivalents of TFA after three days (black) in THF; neutralized sample with excess amount of triethylamine (red).

## Frontier Orbitals

|                                                                                    |                                                                                    |                                                                                    |                                                                                     |                                                                                      |
|------------------------------------------------------------------------------------|------------------------------------------------------------------------------------|------------------------------------------------------------------------------------|-------------------------------------------------------------------------------------|--------------------------------------------------------------------------------------|
| 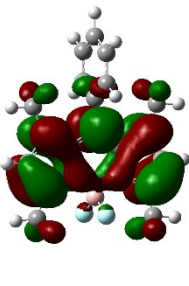  |   |   |   |   |
| -0.0976                                                                            | -0.1113                                                                            | -0.0849                                                                            | -0.0899                                                                             | -0.0922                                                                              |
|  |  |  |  |  |
| -0.2072                                                                            | -0.2227                                                                            | -0.1981                                                                            | -0.2020                                                                             | -0.2022                                                                              |
| <b>1</b>                                                                           | <b>2</b>                                                                           | <b>3</b>                                                                           | <b>4</b>                                                                            | <b>5</b>                                                                             |

Figure S33. Frontier orbitals of BODIPYs **1-5**. Energies in a.u.



# Mass Spectrometry Studies

**Sample Name** Position PI-C1 **Instrument Name** Instrument 1 **User Name**  
**Inj Vol** -1 **InjPosition** Sample **IRM Calibration Status**  
**Data Filename** 27630\_150v\_0.1ul.d **ACQ Method** **Comment** **Acquired Time**

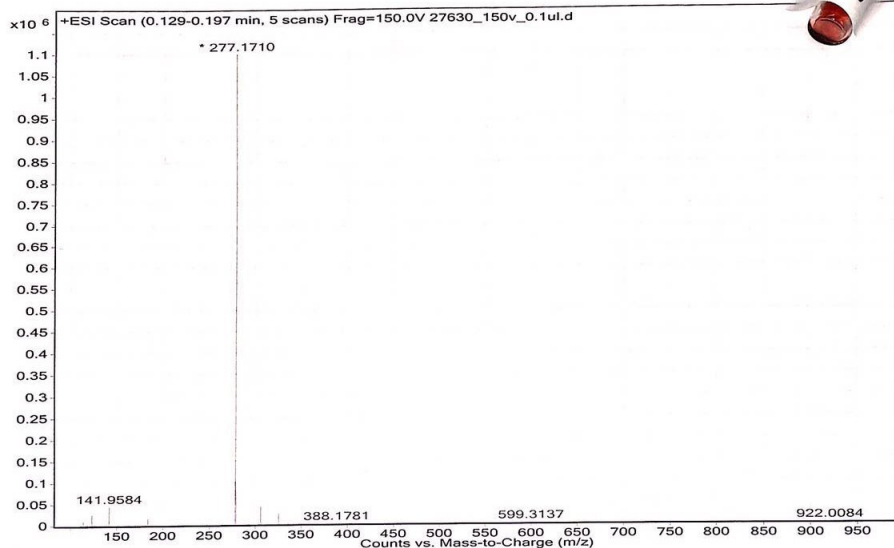

**Sample Name** Position PI-C1 **Instrument Name** Instrument 1 **User Name**  
**Inj Vol** -1 **InjPosition** Sample **IRM Calibration Status** Some Ions Missed  
**Data Filename** 27630\_150v\_0.1ul.d **ACQ Method** **Comment** **Acquired Time** 3/13/2017 2:31:47 PM

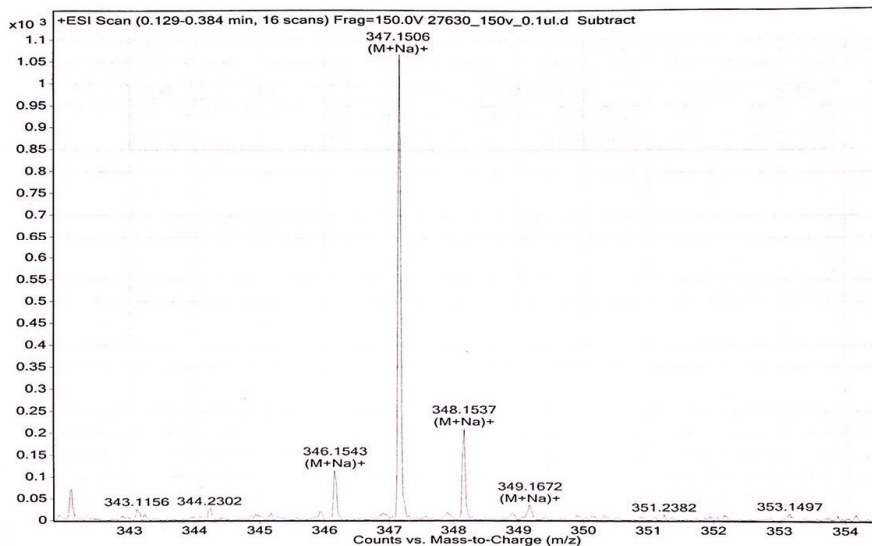

## MS Formula Results: + Scan (0.129-0.197 min) (27630\_150v\_0.1ul.d)

| m/z      | Ion     | Formula            | Abundance |
|----------|---------|--------------------|-----------|
| 346.1554 | (M+Na)+ | C19 H19 B F2 N2 Na | 311.1     |

  

| Best | Formula (M)     | Ion Formula        | Calc m/z | Score | Mass     | Calc Mass | Abs Diff (ppm) | Mass Match |
|------|-----------------|--------------------|----------|-------|----------|-----------|----------------|------------|
| ✓    | C19 H19 B F2 N2 | C19 H19 B F2 N2 Na | 346.1538 | 78.92 | 323.1647 | 323.1646  | 0.28           | 99.95      |

  

| Isotope | Abund% | Calc Abund% | Calc Abund Sum% | m/z      | Calc m/z | Diff (ppm) | Abund Sum% |
|---------|--------|-------------|-----------------|----------|----------|------------|------------|
| 1       | 11.55  | 23.58       | 16.32           | 346.1554 | 346.1538 | -4.63      | 8.8        |
| 2       | 100    | 100         | 69.2            | 347.1506 | 347.1505 | -0.24      | 76.17      |
| 3       | 19.73  | 20.93       | 14.48           | 348.154  | 348.1535 | -1.59      | 15.03      |

Figure S34. Mass spectra of BODIPY 1 with 10 equivalents of TFA (after three days)

Sample Name Position P1-C2 Instrument Name Instrument 1 User Name  
 Inj Vol -1 InjPosition Sample SampleType Sample IRM Calibration Status Missed  
 Data Filename 27631\_150v\_0.1ul.d ACQ Method Comment Acquired Time 2:44:17 PM

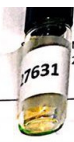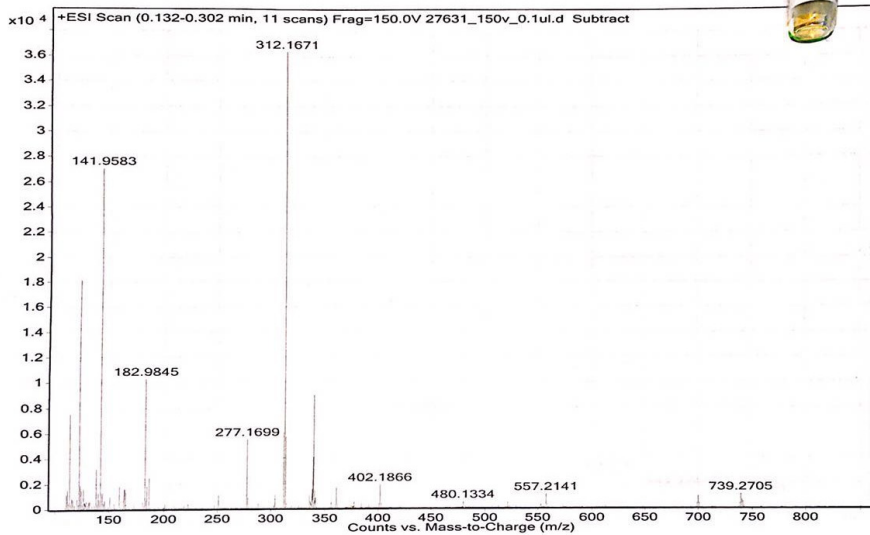

Sample Name Position P1-C2 Instrument Name Instrument 1 User Name  
 Inj Vol -1 InjPosition Sample SampleType Sample IRM Calibration Status Some Ions Missed  
 Data Filename 27631\_150v\_0.1ul.d ACQ Method Comment Acquired Time 3/13/2017 2:44:17 PM

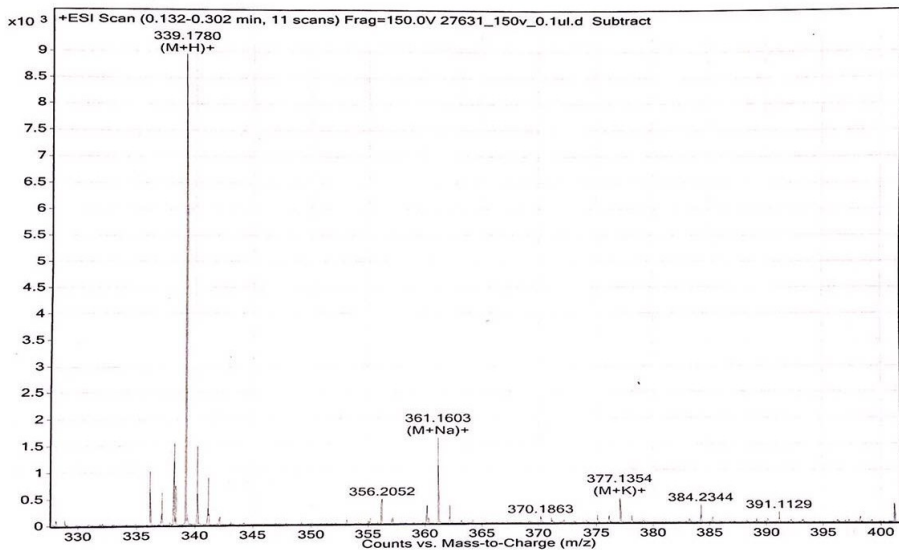

MS Formula Results: + Scan (0.132-0.302 min) Sub (27631\_150v\_0.1ul.d)

| m/z      | Ion    | Formula      | Abundance |
|----------|--------|--------------|-----------|
| 338.1793 | (M+H)+ | C21 H20 B N4 | 1588.9    |

  

| Best                                | Formula (M)  | Ion Formula  | Calc m/z | Score | Mass    | Calc Mass | Abs Diff (ppm) | Mass Match |
|-------------------------------------|--------------|--------------|----------|-------|---------|-----------|----------------|------------|
| <input checked="" type="checkbox"/> | C21 H19 B N4 | C21 H20 B N4 | 338.1812 | 85.54 | 337.174 | 337.1739  | 0.31           | 99.93      |

  

| Isotope | Abund% | Calc Abund% | Calc Abund Sum% | m/z      | Calc m/z | Diff (ppm) | Abund Sum% |
|---------|--------|-------------|-----------------|----------|----------|------------|------------|
| 1       | 17.68  | 23.42       | 15.92           | 338.1793 | 338.1812 | 5.5        | 13.11      |
| 2       | 100    | 100         | 67.98           | 339.1778 | 339.1779 | -0.34      | 74.16      |
| 3       | 17.17  | 23.68       | 16.1            | 340.181  | 340.1807 | -0.85      | 12.73      |

Figure S35. Mass spectra of BODIPY 2 with 10 equivalents of TFA (after three days)

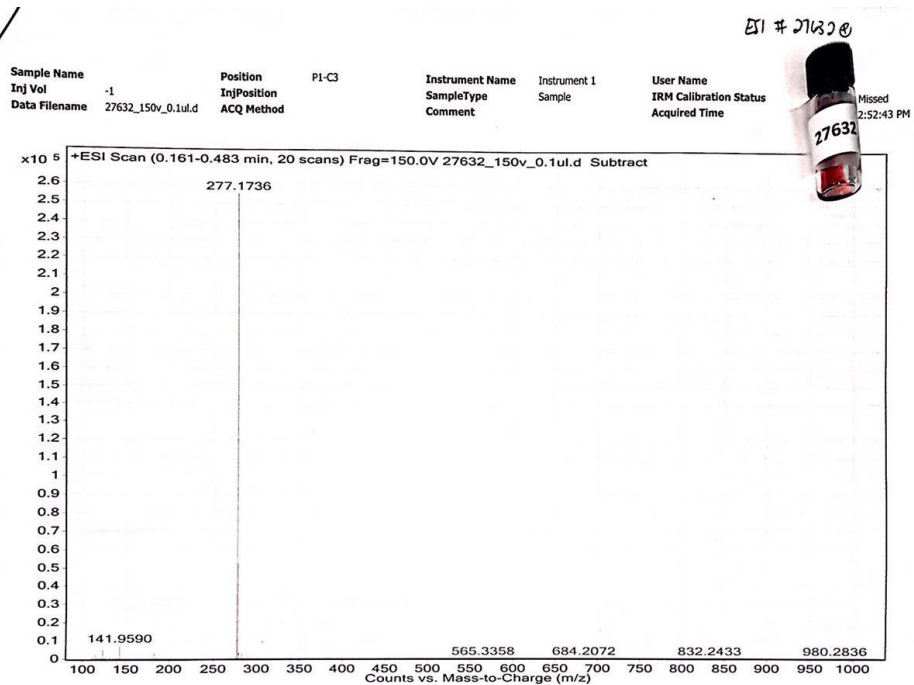

Figure S36. Mass spectra of BODIPY 3 with 10 equivalents of TFA (after three days)

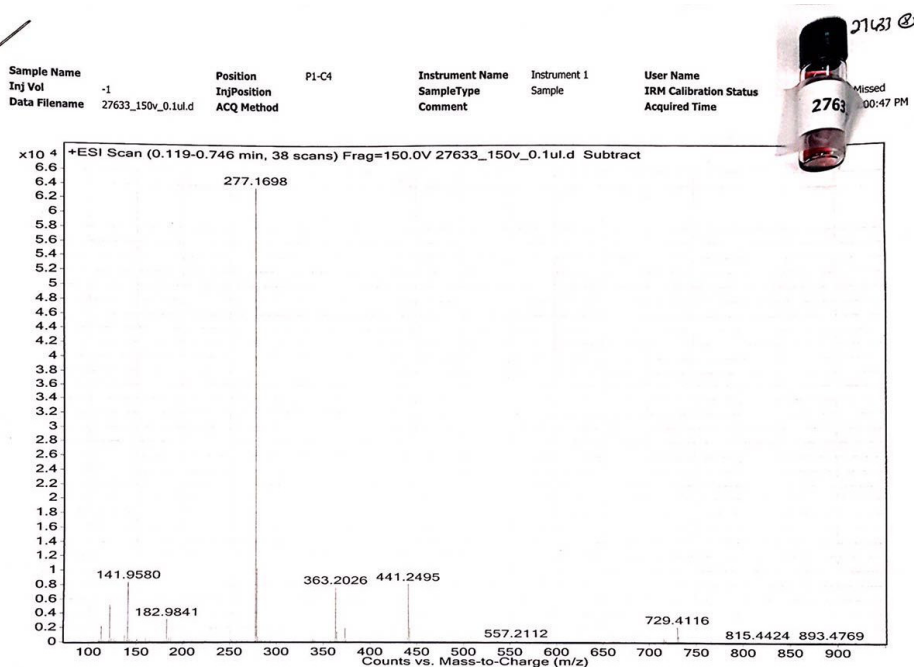

Figure S37. Mass spectra of BODIPY 4 with 10 equivalents of TFA (after three days)

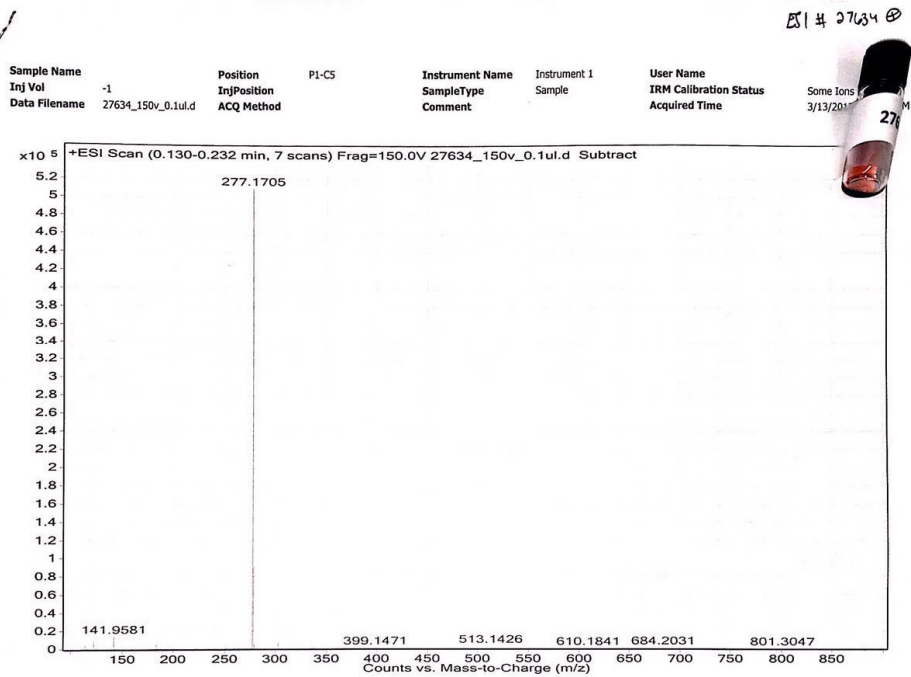

Figure S38. Mass spectra of BODIPY 5 with 10 equivalents of TFA (after three days)

# Infrared Spectra

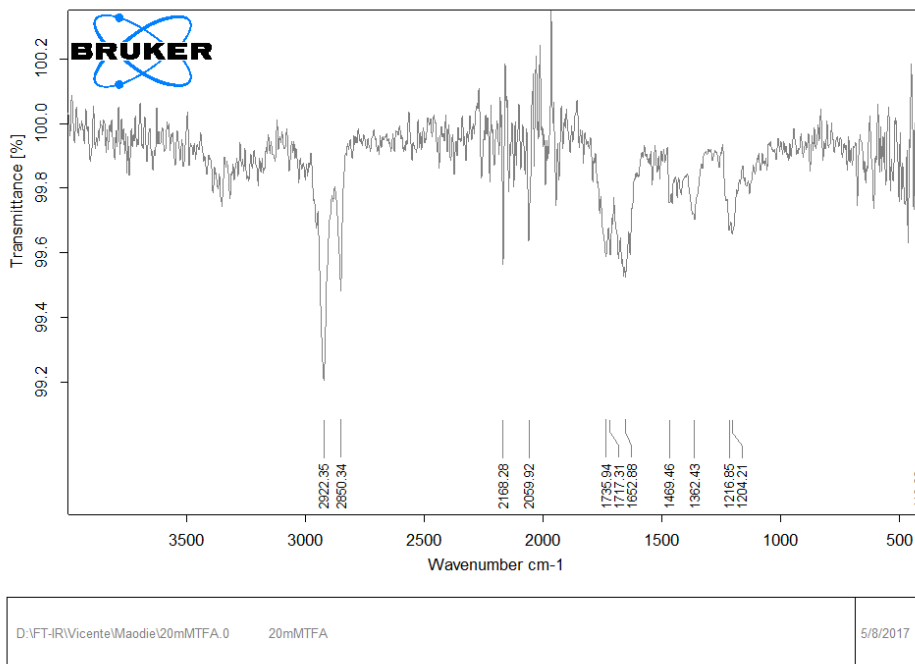

Page 1/1

Figure S39 The infrared spectra of 20 mM TFA in dichloromethane.

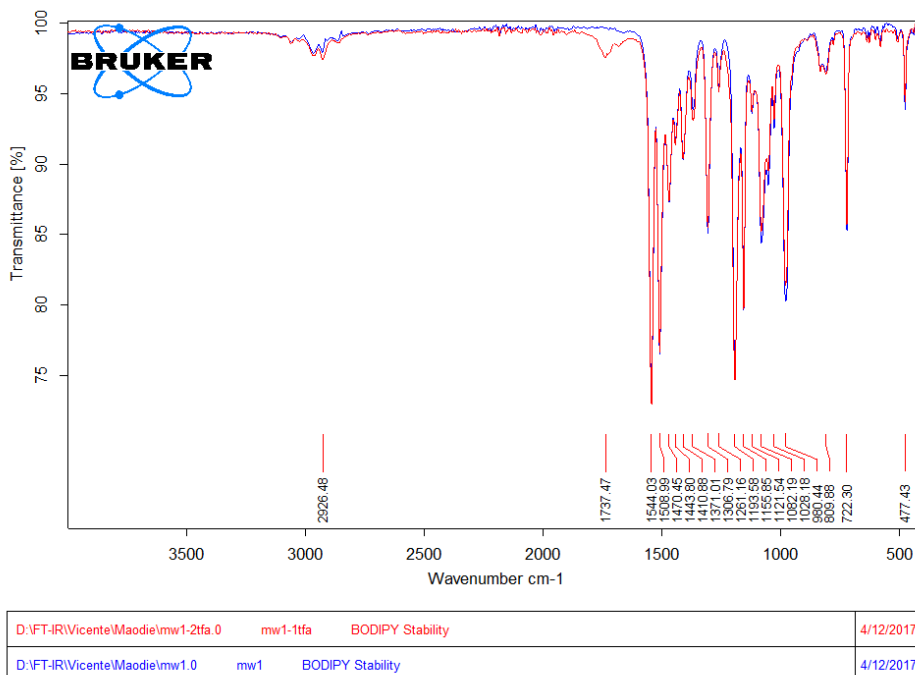

Page 1/1

Figure S40. Infrared spectra of 10 mM BODIPY 1 before (blue) and after (red) addition of 2 equivalents of TFA in dichloromethane.

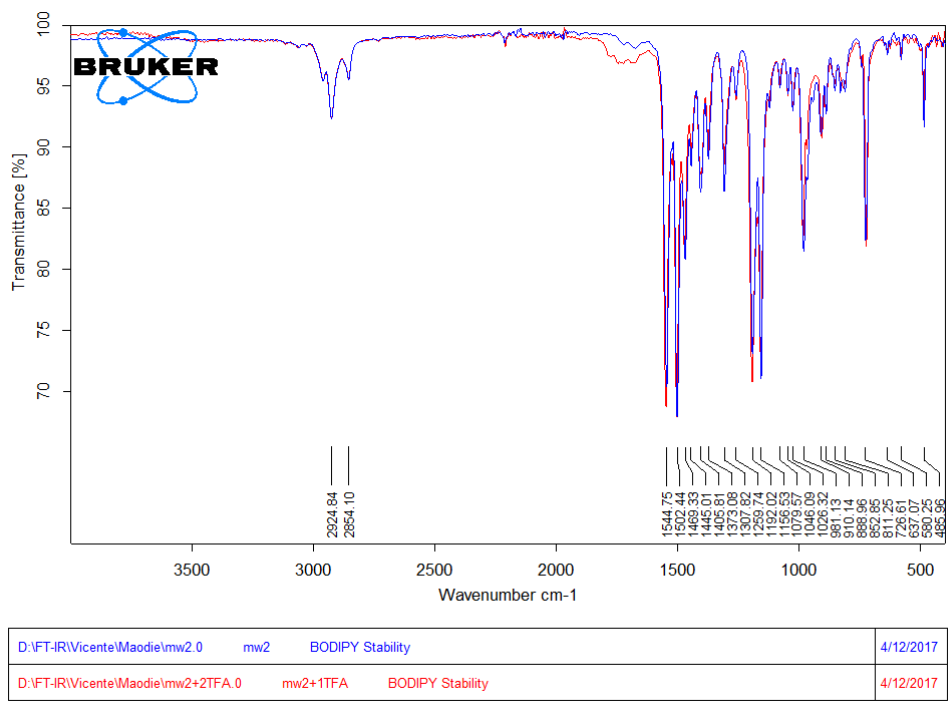

Page 1/1

Figure S41. Infrared spectra of 10 mM BODIPY 2 before (blue) and after (red) addition of 2 equivalents of TFA in dichloromethane.

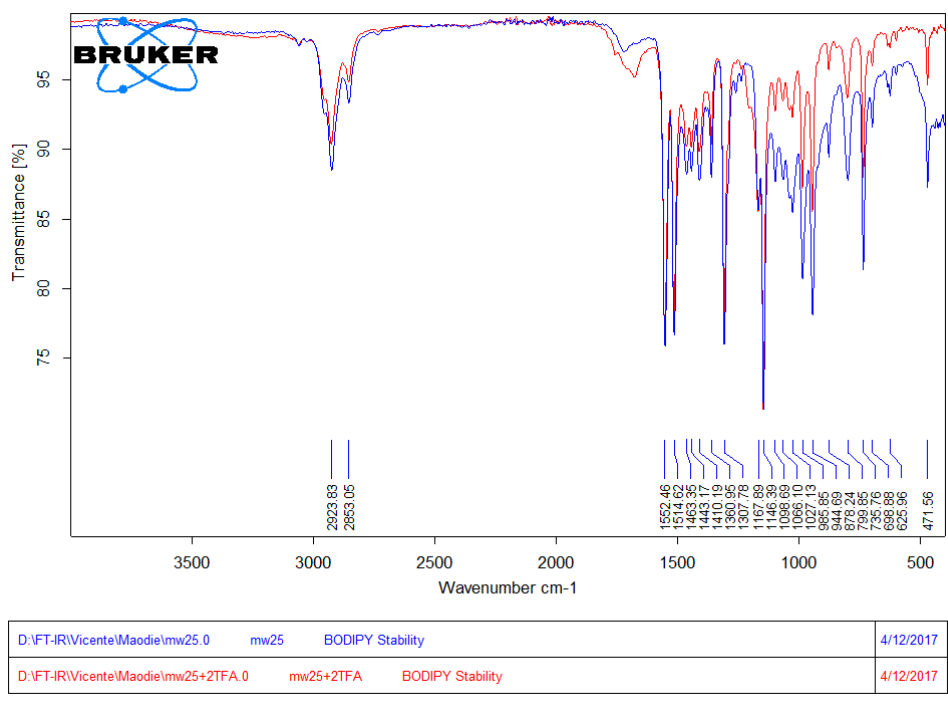

Page 1/1

Figure S42. Infrared spectra of 10 mM BODIPY 3 before (blue) and after (red) addition of 2 equivalents of TFA in dichloromethane.

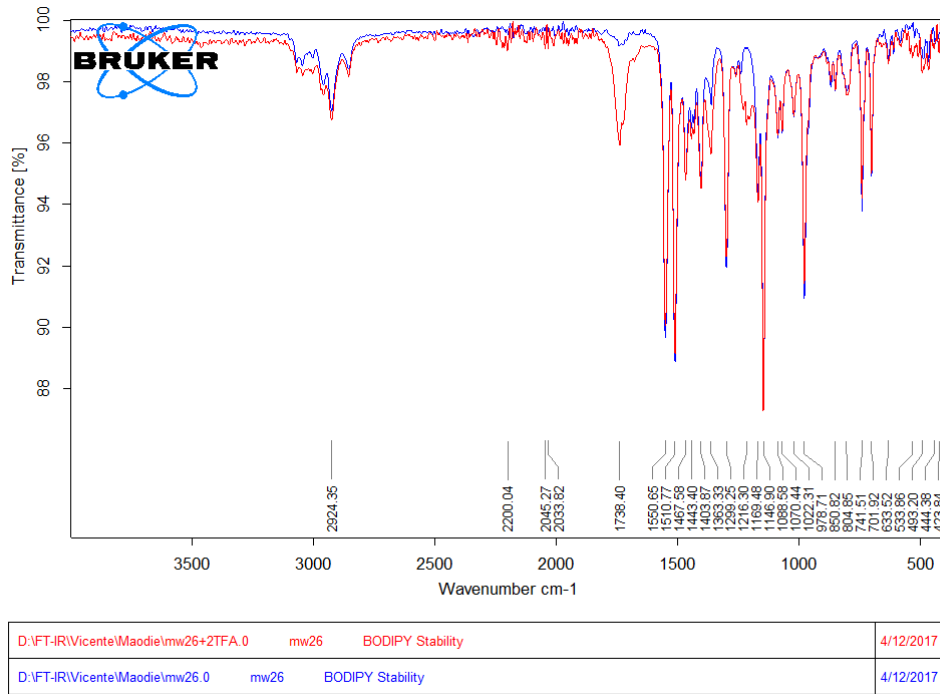

Page 1/1

Figure S43. Infrared spectra of 10 mM BODIPY 4 before (blue) and after (red) addition of 2 equivalents of TFA in dichloromethane.

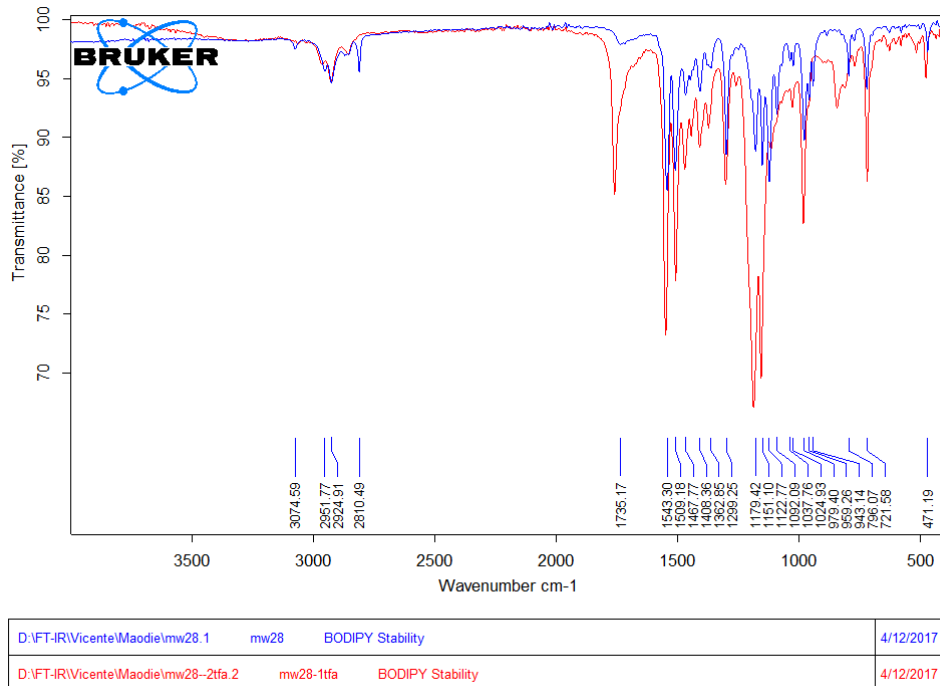

Page 1/1

Figure S44. Infrared spectra of 10 mM BODIPY 5 before (blue) and after (red) addition of 2 equivalents of TFA in dichloromethane.

# Optimized Cartesian Coordinates of ground and excited states of BODIPYs and Hydrogen-bonded Complex

Table S3 B3LYP/6-31+G(d,p) optimized Cartesian coordinates of BODIPY 1.

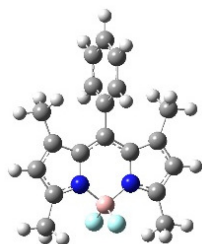

|   |             |             |             |
|---|-------------|-------------|-------------|
| C | -0.37142000 | -2.58259800 | 0.00001300  |
| C | 0.77351200  | -3.37599000 | 0.00002400  |
| C | 0.08925200  | -1.22366900 | 0.00001500  |
| C | 1.90431700  | -2.53555200 | 0.00003000  |
| N | 1.49361900  | -1.24717800 | 0.00001400  |
| C | 0.08925100  | 1.22366900  | -0.00001700 |
| C | -0.37142300 | 2.58259700  | -0.00001200 |
| C | 0.77350800  | 3.37599000  | -0.00002400 |
| C | 1.90431400  | 2.53555400  | -0.00003200 |
| N | 1.49361800  | 1.24717900  | -0.00001200 |
| B | 2.40901900  | 0.00000100  | 0.00000200  |
| F | 3.23354300  | 0.00001300  | 1.14788900  |
| F | 3.23354500  | -0.00001000 | -1.14788500 |
| C | -0.60231700 | -0.00000100 | -0.00000200 |
| C | -2.09840400 | -0.00000100 | -0.00000100 |
| C | -2.80681600 | 0.00009300  | 1.21000600  |
| C | -2.80681800 | -0.00009400 | -1.21000800 |
| C | -4.20419300 | 0.00009700  | 1.20925000  |
| H | -2.26343000 | 0.00016700  | 2.15062200  |
| C | -4.20419500 | -0.00009900 | -1.20925100 |
| H | -2.26343200 | -0.00016900 | -2.15062500 |
| C | -4.90612900 | -0.00000100 | 0.00000000  |
| H | -4.74229400 | 0.00017300  | 2.15265000  |
| H | -4.74229600 | -0.00017400 | -2.15265000 |
| H | -5.99210200 | -0.00000100 | 0.00000100  |
| C | 3.34098100  | 2.94500700  | -0.00004200 |
| H | 3.86158400  | 2.55509700  | 0.88043300  |
| H | 3.86157400  | 2.55508300  | -0.88051800 |
| H | 3.41682900  | 4.03424900  | -0.00005100 |
| C | 3.34098400  | -2.94500300 | 0.00003800  |
| H | 3.86158600  | -2.55509200 | -0.88043800 |
| H | 3.86157800  | -2.55508100 | 0.88051300  |
| H | 3.41683400  | -4.03424600 | 0.00004500  |
| C | -1.77245900 | 3.12004500  | 0.00001300  |
| H | -2.33755300 | 2.79403200  | -0.87837100 |
| H | -2.33752800 | 2.79401600  | 0.87840800  |



|   |             |             |             |
|---|-------------|-------------|-------------|
| H | -1.74468200 | 4.21299800  | 0.00002200  |
| H | 0.80329800  | 4.45770500  | -0.00002500 |
| H | 0.80330300  | -4.45770400 | 0.00002500  |
| C | -1.77245500 | -3.12004900 | -0.00000800 |
| H | -2.33754800 | -2.79403500 | 0.87837600  |
| H | -2.33752600 | -2.79402100 | -0.87840300 |
| H | -1.74467700 | -4.21300200 | -0.00001600 |

Table S4. B3LYP/6-31+G(d,p) optimized Cartesian coordinates of BODIPY 2.

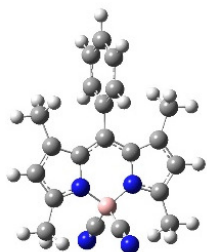

|   |             |             |             |
|---|-------------|-------------|-------------|
| C | -0.58528700 | 2.57747600  | 0.00000500  |
| C | 0.55398700  | 3.37809800  | 0.00000900  |
| C | -0.11922800 | 1.22276600  | 0.00000600  |
| C | 1.69093000  | 2.55126200  | 0.00001100  |
| N | 1.28933600  | 1.25443700  | 0.00000600  |
| C | -0.11914100 | -1.22282400 | -0.00000600 |
| C | -0.58507300 | -2.57758500 | -0.00000500 |
| C | 0.55428000  | -3.37809500 | -0.00001200 |
| C | 1.69114000  | -2.55114700 | -0.00001300 |
| N | 1.28942600  | -1.25436500 | -0.00000500 |
| B | 2.18922900  | 0.00007000  | 0.00000200  |
| C | -0.80878400 | -0.00005000 | 0.00000000  |
| C | -2.30467100 | -0.00007100 | 0.00000000  |
| C | -3.01173600 | -0.00002000 | -1.21062900 |
| C | -3.01173600 | -0.00008600 | 1.21062800  |
| C | -4.40900600 | -0.00001200 | -1.20942800 |
| H | -2.46852700 | 0.00001200  | -2.15129500 |
| C | -4.40900600 | -0.00008100 | 1.20942800  |
| H | -2.46852700 | -0.00010600 | 2.15129500  |
| C | -5.11055800 | -0.00004900 | 0.00000000  |
| H | -4.94713700 | 0.00002200  | -2.15269900 |
| H | -4.94713700 | -0.00009900 | 2.15269900  |
| H | -6.19645500 | -0.00004200 | 0.00000000  |
| C | 3.11804900  | -2.98967800 | -0.00001900 |
| H | 3.65296100  | -2.62215700 | -0.88207000 |
| H | 3.65296500  | -2.62216500 | 0.88203300  |
| H | 3.16422300  | -4.08029000 | -0.00002400 |
| C | 3.11779100  | 2.98995200  | 0.00001300  |
| H | 3.65274200  | 2.62249400  | 0.88206300  |
| H | 3.65274400  | 2.62249600  | -0.88203800 |
| H | 3.16384600  | 4.08056900  | 0.00001400  |
| C | -1.98788500 | -3.10923300 | 0.00000400  |
| H | -2.55072200 | -2.78082100 | 0.87859200  |
| H | -2.55072800 | -2.78083300 | -0.87858500 |
| H | -1.96290500 | -4.20200100 | 0.00001100  |
| H | 0.57761900  | -4.45966300 | -0.00001400 |
| H | 0.57721900  | 4.45966800  | 0.00000900  |
| C | -1.98815900 | 3.10896000  | -0.00000300 |
| H | -2.55095800 | 2.78047800  | -0.87859100 |
| H | -2.55096200 | 2.78049200  | 0.87858700  |
| H | -1.96330900 | 4.20173200  | -0.00001100 |
| C | 3.12509800  | 0.00009900  | 1.31435000  |
| C | 3.12510100  | 0.00011000  | -1.31434400 |

|   |            |            |             |
|---|------------|------------|-------------|
| N | 3.77920700 | 0.00003300 | 2.27691500  |
| N | 3.77921200 | 0.00005200 | -2.27690800 |

Table S5. B3LYP/6-31+G(d,p) optimized Cartesian coordinates of BODIPY 3.

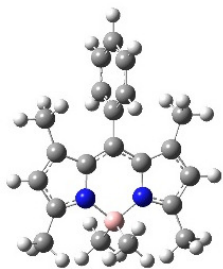

|   |             |             |             |
|---|-------------|-------------|-------------|
| C | 0.40420400  | -2.57414000 | -0.03736100 |
| C | -0.71572000 | -3.39019100 | -0.00317800 |
| C | -0.09906300 | -1.22742600 | -0.02391700 |
| C | -1.87036600 | -2.57425300 | 0.03306300  |
| N | -1.50621200 | -1.27463800 | 0.00635600  |
| C | -0.09906500 | 1.22749400  | 0.02383000  |
| C | 0.40420800  | 2.57420400  | 0.03730300  |
| C | -0.71571600 | 3.39025700  | 0.00301000  |
| C | -1.87036300 | 2.57433200  | -0.03320400 |
| N | -1.50621500 | 1.27470700  | -0.00644900 |
| B | -2.47327800 | 0.00002300  | 0.00001400  |
| C | 0.58078000  | 0.00002700  | -0.00004700 |
| C | 2.07822400  | -0.00000400 | 0.00000500  |
| C | 2.78780500  | 0.02473600  | -1.20886800 |
| C | 2.78771000  | -0.02482400 | 1.20893200  |
| C | 4.18520500  | 0.02460300  | -1.20872800 |
| H | 2.24447200  | 0.04431900  | -2.14939500 |
| C | 4.18511100  | -0.02480200 | 1.20889900  |
| H | 2.24430200  | -0.04437900 | 2.14941600  |
| C | 4.88753500  | -0.00012300 | 0.00011200  |
| H | 4.72326700  | 0.04393300  | -2.15207300 |
| H | 4.72309900  | -0.04418300 | 2.15228500  |
| H | 5.97358200  | -0.00016700 | 0.00015400  |
| C | -3.26672600 | 3.10474800  | -0.14677300 |
| H | -3.58110300 | 3.14901700  | -1.19653400 |
| H | -3.99948400 | 2.50292600  | 0.38908400  |
| H | -3.29819400 | 4.12437400  | 0.24680900  |
| C | -3.26672400 | -3.10468800 | 0.14666700  |
| H | -3.58019600 | -3.15098800 | 1.19662200  |
| H | -3.99983900 | -2.50173100 | -0.38738100 |
| H | -3.29867100 | -4.12355900 | -0.24884600 |
| C | 1.81568700  | 3.08663400  | 0.08199500  |
| H | 2.35107600  | 2.74883800  | 0.97434400  |
| H | 2.40406000  | 2.76168600  | -0.78118800 |
| H | 1.80263200  | 4.18035900  | 0.08937300  |
| H | -0.72273800 | 4.47291500  | 0.00043300  |
| H | -0.72274400 | -4.47284900 | -0.00064400 |
| C | 1.81569200  | -3.08655000 | -0.08198000 |
| H | 2.35109700  | -2.74878400 | -0.97433200 |
| H | 2.40403500  | -2.76154300 | 0.78120200  |
| H | 1.80265900  | -4.18027500 | -0.08930600 |
| C | -3.33612300 | -0.01413600 | 1.38832300  |
| H | -3.94918200 | 0.88333700  | 1.52617700  |

|   |             |             |             |
|---|-------------|-------------|-------------|
| H | -4.02826800 | -0.86253700 | 1.43818000  |
| H | -2.67606900 | -0.08426700 | 2.26462000  |
| C | -3.33632500 | 0.01414100  | -1.38818300 |
| H | -4.02940200 | 0.86181300  | -1.43741900 |
| H | -2.67644000 | 0.08552500  | -2.26450900 |
| H | -3.94840300 | -0.88391800 | -1.52658000 |

Table S6. B3LYP/6-31+G(d,p) optimized Cartesian coordinates of BODIPY 4.

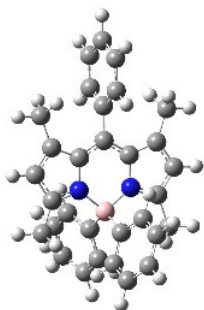

|   |             |             |             |
|---|-------------|-------------|-------------|
| C | 1.53896100  | 0.66053900  | 2.48767500  |
| C | 0.41374600  | 0.89128700  | 3.26586200  |
| C | 1.04502800  | 0.30569000  | 1.18606100  |
| C | -0.73577800 | 0.68297500  | 2.47287600  |
| N | -0.36269200 | 0.32722900  | 1.22348000  |
| C | 1.04505800  | -0.30439500 | -1.18634400 |
| C | 1.53902300  | -0.65872200 | -2.48808600 |
| C | 0.41384300  | -0.89032200 | -3.26607400 |
| C | -0.73569200 | -0.68306600 | -2.47282600 |
| N | -0.36264700 | -0.32711800 | -1.22347800 |
| B | -1.33109900 | -0.00060200 | 0.00015000  |
| C | 1.72933600  | 0.00092000  | -0.00020300 |
| C | 3.22644600  | 0.00151000  | -0.00034100 |
| C | 3.93598300  | -1.15883700 | 0.33937300  |
| C | 3.93500500  | 1.16241000  | -0.34019300 |
| C | 5.33326500  | -1.15838200 | 0.33822700  |
| H | 3.39263500  | -2.06149800 | 0.60396400  |
| C | 5.33228700  | 1.16305700  | -0.33930800 |
| H | 3.39089400  | 2.06464400  | -0.60467700 |
| C | 6.03505500  | 0.00261400  | -0.00060900 |
| H | 5.87164700  | -2.06396800 | 0.60237700  |
| H | 5.86990700  | 2.06906700  | -0.60355900 |
| H | 7.12106600  | 0.00304000  | -0.00071200 |
| C | -2.14401500 | -0.82921000 | -2.94879300 |
| H | -2.76220900 | -1.37538300 | -2.23244200 |
| H | -2.61128500 | 0.14840200  | -3.10748900 |
| H | -2.15018200 | -1.36664600 | -3.90032400 |
| C | -2.14411700 | 0.82790300  | 2.94916100  |
| H | -2.76288000 | 1.37377900  | 2.23307200  |
| H | -2.61057500 | -0.15012000 | 3.10768800  |
| H | -2.15051100 | 1.36508300  | 3.90083400  |
| C | 2.94876100  | -0.78208100 | -2.99107700 |
| H | 3.49308800  | 0.16511500  | -2.92962300 |
| H | 3.52890000  | -1.51783900 | -2.42641500 |
| H | 2.93232000  | -1.09514300 | -4.03884100 |
| H | 0.40141200  | -1.18629800 | -4.30722700 |
| H | 0.40127600  | 1.18736400  | 4.30698600  |
| C | 2.94869500  | 0.78519300  | 2.99035600  |
| H | 3.49403000  | -0.16138300 | 2.92839300  |

|   |             |             |             |
|---|-------------|-------------|-------------|
| H | 3.52788900  | 1.52180200  | 2.42582400  |
| H | 2.93218900  | 1.09785200  | 4.03823900  |
| C | -2.16787500 | -1.36663600 | 0.36983900  |
| C | -3.48610300 | -1.39807400 | 0.86387100  |
| C | -1.52161300 | -2.61653900 | 0.25701600  |
| C | -4.12733500 | -2.59432100 | 1.21107400  |
| H | -4.03593100 | -0.47116000 | 0.99087300  |
| C | -2.14486800 | -3.81865100 | 0.60318500  |
| H | -0.50134000 | -2.65459000 | -0.11777300 |
| C | -3.45952800 | -3.81398600 | 1.08113800  |
| H | -5.14846900 | -2.56931400 | 1.58390200  |
| H | -1.60646800 | -4.75754400 | 0.49839600  |
| H | -3.95301200 | -4.74458400 | 1.34835500  |
| C | -2.16986100 | 1.36427900  | -0.36929400 |
| C | -3.48842000 | 1.39394400  | -0.86254200 |
| C | -1.52511800 | 2.61501900  | -0.25704800 |
| C | -4.13139600 | 2.58932100  | -1.20951000 |
| H | -4.03709900 | 0.46629400  | -0.98914000 |
| C | -2.15012100 | 3.81628300  | -0.60300500 |
| H | -0.50466700 | 2.65441200  | 0.11711900  |
| C | -3.46507300 | 3.80985800  | -1.08014500 |
| H | -5.15271700 | 2.56296100  | -1.58173100 |
| H | -1.61286300 | 4.75588200  | -0.49869000 |
| H | -3.95991200 | 4.73978500  | -1.34719200 |

Table S7. B3LYP/6-31+G(d,p) optimized Cartesian coordinates of BODIPY 5.

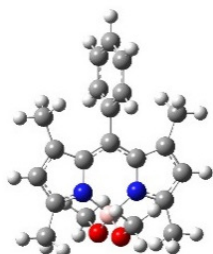

|   |             |             |             |
|---|-------------|-------------|-------------|
| C | 0.00000000  | 2.58217300  | 0.61416600  |
| C | 0.00000000  | 3.38120300  | -0.52448200 |
| C | 0.00000000  | 1.22545600  | 0.14046000  |
| C | 0.00000000  | 2.54445900  | -1.66203400 |
| N | 0.00000000  | 1.25423900  | -1.26347500 |
| C | 0.00000000  | -1.22545600 | 0.14046000  |
| C | 0.00000000  | -2.58217300 | 0.61416600  |
| C | 0.00000000  | -3.38120300 | -0.52448200 |
| C | 0.00000000  | -2.54445900 | -1.66203400 |
| N | 0.00000000  | -1.25423900 | -1.26347500 |
| B | 0.00000000  | 0.00000000  | -2.23869400 |
| C | 0.00000000  | 0.00000000  | 0.82898700  |
| C | 0.00000000  | 0.00000000  | 2.32570500  |
| C | -1.20935100 | 0.00000000  | 3.03526800  |
| C | 1.20935100  | 0.00000000  | 3.03526800  |
| C | -1.20905000 | 0.00000000  | 4.43265900  |
| H | -2.15020100 | 0.00000000  | 2.49223200  |
| C | 1.20905000  | 0.00000000  | 4.43265900  |
| H | 2.15020100  | 0.00000000  | 2.49223200  |
| C | 0.00000000  | 0.00000000  | 5.13494300  |
| H | -2.15258500 | 0.00000000  | 4.97065600  |
| H | 2.15258500  | 0.00000000  | 4.97065600  |
| H | 0.00000000  | 0.00000000  | 6.22094600  |
| C | 0.00000000  | -2.97705500 | -3.09287500 |
| H | -0.87662300 | -2.58973400 | -3.62070400 |
| H | 0.87662300  | -2.58973400 | -3.62070400 |
| H | 0.00000000  | -4.06798800 | -3.14982200 |
| C | 0.00000000  | 2.97705500  | -3.09287500 |
| H | 0.87662300  | 2.58973400  | -3.62070400 |
| H | -0.87662300 | 2.58973400  | -3.62070400 |
| H | 0.00000000  | 4.06798800  | -3.14982200 |
| C | 0.00000000  | -3.11314600 | 2.01855700  |
| H | 0.87814000  | -2.78600200 | 2.58352400  |
| H | -0.87814000 | -2.78600200 | 2.58352400  |
| H | 0.00000000  | -4.20646600 | 1.99506100  |
| H | 0.00000000  | -4.46339600 | -0.54884800 |
| H | 0.00000000  | 4.46339600  | -0.54884800 |
| C | 0.00000000  | 3.11314600  | 2.01855700  |
| H | -0.87814000 | 2.78600200  | 2.58352400  |
| H | 0.87814000  | 2.78600200  | 2.58352400  |
| H | 0.00000000  | 4.20646600  | 1.99506100  |
| C | 2.44414300  | 0.00000000  | -2.51577800 |
| H | 2.61663700  | 0.88999600  | -1.89129300 |



|   |             |             |             |
|---|-------------|-------------|-------------|
| H | 2.61663700  | -0.88999600 | -1.89129300 |
| H | 3.18364800  | 0.00000000  | -3.32313600 |
| O | 1.15719100  | 0.00000000  | -3.09645800 |
| C | -2.44414300 | 0.00000000  | -2.51577800 |
| H | -2.61663700 | -0.88999600 | -1.89129300 |
| H | -2.61663700 | 0.88999600  | -1.89129300 |
| H | -3.18364800 | 0.00000000  | -3.32313600 |
| O | -1.15719100 | 0.00000000  | -3.09645800 |

Table S2. B3LYP/6-31+G(d,p) optimized Cartesian coordinates of the unusually stable hydrogen-bonded complex between BODIPY **2** and TFA.

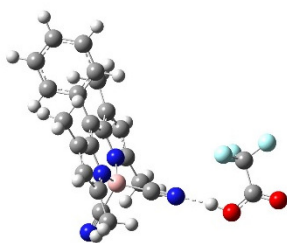

|   |             |             |             |
|---|-------------|-------------|-------------|
| C | -1.82784600 | -0.55468500 | 2.53596800  |
| C | -0.90290400 | -0.04468400 | 3.44414000  |
| C | -1.55434600 | 0.08771000  | 1.28582500  |
| C | -0.08074700 | 0.88344300  | 2.78409600  |
| N | -0.47072800 | 0.96690100  | 1.48464100  |
| C | -1.71354100 | 0.73015100  | -1.06773800 |
| C | -2.16386500 | 0.80048200  | -2.42522800 |
| C | -1.34528400 | 1.73376100  | -3.05729900 |
| C | -0.41675200 | 2.22899400  | -2.12685800 |
| N | -0.63530800 | 1.62719700  | -0.92792700 |
| B | 0.15039900  | 1.83859300  | 0.37867300  |
| C | -2.16319500 | -0.02663100 | 0.02602800  |
| C | -3.31475100 | -0.96444600 | -0.15185700 |
| C | -4.62755400 | -0.51532700 | 0.04887900  |
| C | -3.09130300 | -2.29808100 | -0.52157900 |
| C | -5.70369900 | -1.39042500 | -0.11865600 |
| H | -4.80563200 | 0.51728100  | 0.33513900  |
| C | -4.16914900 | -3.17125100 | -0.68886800 |
| H | -2.07591500 | -2.65094100 | -0.67806400 |
| C | -5.47706700 | -2.71982100 | -0.48791900 |
| H | -6.71674900 | -1.03262400 | 0.03940900  |
| H | -3.98557900 | -4.20244100 | -0.97561000 |
| H | -6.31395000 | -3.39932700 | -0.61835800 |
| C | 0.64330500  | 3.25024100  | -2.37598400 |
| H | 0.47332000  | 4.15772800  | -1.78691600 |
| H | 1.64011500  | 2.87641100  | -2.11982500 |
| H | 0.64372000  | 3.52339500  | -3.43269900 |
| C | 1.04224100  | 1.66720600  | 3.37881300  |
| H | 0.84854600  | 2.74420000  | 3.33782400  |
| H | 1.17134500  | 1.38199500  | 4.42445000  |
| H | 1.98764000  | 1.48513900  | 2.85684000  |
| C | -3.27596600 | 0.05872200  | -3.10533300 |
| H | -3.12480800 | -1.02423600 | -3.07334100 |
| H | -4.24555700 | 0.25839600  | -2.64010800 |
| H | -3.33082700 | 0.36479300  | -4.15311300 |
| H | -1.40291900 | 2.03804600  | -4.09379300 |
| H | -0.81904700 | -0.30969800 | 4.48953100  |
| C | -2.87187300 | -1.57473600 | 2.88142700  |
| H | -3.88411000 | -1.20494800 | 2.69457700  |
| H | -2.75578900 | -2.49263200 | 2.29765600  |
| H | -2.79249500 | -1.83254300 | 3.94058200  |
| O | 6.98026600  | -1.09024600 | -0.65787800 |

|   |            |             |             |
|---|------------|-------------|-------------|
| C | 4.74580300 | -1.91412900 | -0.32361500 |
| F | 4.11895800 | -1.81148900 | 0.87209700  |
| F | 5.29239800 | -3.13236200 | -0.40316600 |
| F | 3.80318900 | -1.81153100 | -1.29013500 |
| C | 5.82097500 | -0.79662500 | -0.48160300 |
| O | 5.37258900 | 0.44010000  | -0.40974500 |
| H | 4.38515700 | 0.56355800  | -0.26057000 |
| C | 1.69388000 | 1.38941200  | 0.15135900  |
| N | 2.78661900 | 1.03839500  | -0.01833500 |
| C | 0.11971900 | 3.39028100  | 0.80469900  |
| N | 0.06710300 | 4.51056600  | 1.11393800  |

Table S9. M06-2X/6-31+G(d,p) optimized Cartesian coordinates for the first excited state of BODIPY 2.

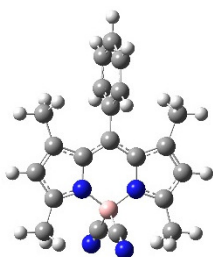

|   |             |             |             |
|---|-------------|-------------|-------------|
| C | 0.57946100  | -2.58395300 | 0.00000300  |
| C | -0.55983600 | -3.37234000 | 0.00000400  |
| C | 0.11616200  | -1.21816700 | 0.00000700  |
| C | -1.69839200 | -2.53336700 | 0.00000900  |
| N | -1.28580300 | -1.24023000 | 0.00000700  |
| C | 0.11614400  | 1.21818200  | 0.00000000  |
| C | 0.57941600  | 2.58397900  | -0.00001100 |
| C | -0.55989700 | 3.37234300  | -0.00003600 |
| C | -1.69843700 | 2.53334800  | -0.00003300 |
| N | -1.28582300 | 1.24021900  | 0.00000400  |
| B | -2.18327200 | -0.00001200 | 0.00001700  |
| C | 0.83256800  | 0.00001200  | 0.00000700  |
| C | 2.32019200  | 0.00001300  | 0.00000300  |
| C | 3.02504400  | 0.00001300  | -1.20758100 |
| C | 3.02505000  | 0.00000300  | 1.20758400  |
| C | 4.41898500  | 0.00001200  | -1.20776100 |
| H | 2.47606300  | 0.00001600  | -2.14569500 |
| C | 4.41899100  | 0.00000100  | 1.20775600  |
| H | 2.47607400  | -0.00000200 | 2.14570000  |
| C | 5.11718600  | 0.00000700  | -0.00000400 |
| H | 4.95898400  | 0.00001400  | -2.14942000 |
| H | 4.95899500  | -0.00000500 | 2.14941200  |
| H | 6.20264600  | 0.00000600  | -0.00000700 |
| C | -3.12620400 | 2.94010900  | -0.00007100 |
| H | -3.65170700 | 2.55448200  | -0.88212700 |
| H | -3.65173900 | 2.55454800  | 0.88199300  |
| H | -3.19583200 | 4.02818800  | -0.00011200 |
| C | -3.12615200 | -2.94015800 | 0.00001500  |
| H | -3.65167600 | -2.55457500 | 0.88207700  |
| H | -3.65168200 | -2.55457700 | -0.88204400 |
| H | -3.19575600 | -4.02823800 | 0.00001600  |
| C | 1.99096100  | 3.07923300  | -0.00001200 |
| H | 2.54443900  | 2.73368900  | 0.87896600  |
| H | 2.54444700  | 2.73366200  | -0.87897600 |
| H | 1.99062000  | 4.17139300  | -0.00002900 |
| H | -0.59722300 | 4.45419700  | -0.00006100 |
| H | -0.59714000 | -4.45419400 | 0.00000300  |
| C | 1.99101900  | -3.07917000 | -0.00000100 |

|   |             |             |             |
|---|-------------|-------------|-------------|
| H | 2.54449100  | -2.73359300 | -0.87897200 |
| H | 2.54449300  | -2.73359900 | 0.87897100  |
| H | 1.99070900  | -4.17132900 | -0.00000400 |
| C | -3.13113000 | -0.00002000 | 1.31040600  |
| C | -3.13116300 | -0.00001000 | -1.31034900 |
| N | -3.79434500 | -0.00003900 | 2.26073900  |
| N | -3.79440900 | -0.00001400 | -2.26066100 |

Table S10. M06-2X/6-31+G(d,p) optimized Cartesian coordinates for the first excited state of the hydrogen-bonded complex between BODIPY 2 and TFA.

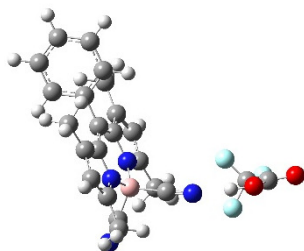

|   |             |             |             |
|---|-------------|-------------|-------------|
| C | -1.17340000 | -2.12469800 | 1.36945600  |
| C | 0.03111700  | -2.20809600 | 2.04993800  |
| C | -1.24446200 | -0.78082600 | 0.85239200  |
| C | 0.68910200  | -0.95952500 | 1.97525700  |
| N | -0.08623200 | -0.10289400 | 1.26215400  |
| C | -2.07968800 | 1.23231700  | -0.23782900 |
| C | -2.91638500 | 2.13121500  | -0.99317200 |
| C | -2.25359700 | 3.34843900  | -1.00723200 |
| C | -1.04110800 | 3.22005900  | -0.29306600 |
| N | -0.94333000 | 1.94783600  | 0.17102100  |
| B | 0.25717000  | 1.33484100  | 0.88422400  |
| C | -2.24290800 | -0.13368400 | 0.08789100  |
| C | -3.45015700 | -0.87768200 | -0.35413400 |
| C | -4.66181600 | -0.72918600 | 0.32866900  |
| C | -3.38173700 | -1.73802700 | -1.45477300 |
| C | -5.79136600 | -1.43276800 | -0.08448400 |
| H | -4.71306200 | -0.06333400 | 1.18624500  |
| C | -4.51231400 | -2.43929300 | -1.86973300 |
| H | -2.43947800 | -1.85253100 | -1.98433100 |
| C | -5.71801500 | -2.28843200 | -1.18422200 |
| H | -6.72755700 | -1.31479700 | 0.45213500  |
| H | -4.45220400 | -3.10259600 | -2.72685000 |
| H | -6.59822300 | -2.83650600 | -1.50533600 |
| C | -0.01476400 | 4.26506100  | -0.04783100 |
| H | -0.01925200 | 4.58073400  | 1.00307500  |
| H | 0.99666800  | 3.90728800  | -0.27173800 |
| H | -0.22360300 | 5.13560700  | -0.67050900 |
| C | 1.98798600  | -0.57935700 | 2.58658500  |
| H | 1.83171100  | 0.03003100  | 3.48648900  |
| H | 2.53449000  | -1.47928700 | 2.87246800  |
| H | 2.61047400  | 0.00679300  | 1.90261800  |
| C | -4.23073700 | 1.84437500  | -1.64725500 |
| H | -4.19378900 | 0.93995800  | -2.26162800 |
| H | -5.02720500 | 1.69655300  | -0.91010800 |
| H | -4.50791100 | 2.68781900  | -2.28329800 |
| H | -2.58756100 | 4.25890400  | -1.48838700 |
| H | 0.41995200  | -3.07430200 | 2.56987800  |
| C | -2.17462600 | -3.22686700 | 1.22612900  |

|   |             |             |             |
|---|-------------|-------------|-------------|
| H | -3.18364800 | -2.90133600 | 1.49602900  |
| H | -2.22480500 | -3.59797300 | 0.19691500  |
| H | -1.89067600 | -4.05825100 | 1.87497800  |
| O | 6.12374900  | -1.10344900 | -2.43008900 |
| C | 4.79835200  | -1.06342700 | -0.43944400 |
| F | 4.87765300  | -0.05452700 | 0.44169100  |
| F | 5.58429400  | -2.04750500 | -0.02113400 |
| F | 3.53123600  | -1.50512500 | -0.43842000 |
| C | 5.20712000  | -0.57986200 | -1.85442700 |
| O | 4.49037300  | 0.40831600  | -2.33142300 |
| H | 3.74372300  | 0.73052600  | -1.74023200 |
| C | 1.54643700  | 1.31474900  | -0.11479500 |
| N | 2.45533500  | 1.24096100  | -0.82503300 |
| C | 0.65083700  | 2.19621100  | 2.18568600  |
| N | 0.91297700  | 2.81606900  | 3.12838700  |
